# Supplementary material
Source: ML conference proceedings conference paper supplement (https://openaccess.thecvf.com/content/ICCV2023/html/Panos_First_Session_Adaptation_ICCV_2023_paper.html)
Supplement: Supplementary file 1 [file Panos_First_Session_Adaptation_ICCV_2023_supplemental.pdf]

# First Session Adaptation: A Strong Replay-Free Baseline for Class-Incremental Learning: Supplement

Aristeidis Panos  
University of Cambridge  
ap2313@cam.ac.uk

Yuriko Kobe  
University of Cambridge  
yk384@cam.ac.uk

Daniel Olmeda Reino  
Toyota Motor Europe  
daniel.olmeda.reino@toyota-europe.com

Rahaf Aljundi  
Toyota Motor Europe  
rahaf.al.jundi@toyota-europe.com

Richard E. Turner  
University of Cambridge  
ret26@cam.ac.uk

## I. Datasets

The exact numbers of training samples and classes for each dataset used in the experiments of Section 4 in the main paper are given in Table 1. For datasets with more than 120k training instances in VTAB+, due to hardware limitations, we randomly sample 120k images and the associated labels and we consider this subset as the full training set. For instance, when we use dSprites-location dataset in a 50-shot setting, we first randomly sample 120k examples and then we randomly pick 50 images for each one of the 16 classes. For DomainNet and iNaturalist we apply a different procedure (see Section II for details).

For evaluation, we consider the protocol used in [30] on the 19 datasets in VTAB, where a balanced dataset of 2k images is created by randomly sampling images from the full test dataset. For FGVC-Aircraft, Cars, and Letters the full test dataset is utilized. We also use the full test dataset for evaluation in the high-shot Class-Incremental Learning (CIL) setting.

## II. Dataset Information for the Class-Incremental Learning Experiments

In Table 2, we present detailed information about the Class-Incremental Learning Experiments (CIL) experiments that are in Section 4.3 in the main paper, such as the number of total sessions, number of train instances, and classes per session. Next, we discuss the exact setup for DomainNet and iNaturalist.

**DomainNet & iNaturalist.** DomainNet and iNaturalist are the only datasets for which we follow a different pre-processing procedure from the one described

in Section I in order to create a few-shot CIL scenario similar to the ones considered in the literature. This is due to the large number of classes (iNaturalist has 10,000 classes) and different domains (DomainNet includes images from 6 domains) these datasets have.

DomainNet is a large-scale dataset of  $\sim 0.6$ M images lying in 6 different domains (clipart, infograph, painting, quickdraw, real, sketch) and categorized into 365 distinct classes. These classes can be grouped into 24 superclasses: furniture, mammal, tool, cloth, electricity, building, office, human body, road transportation, food, nature, cold-blooded, music, fruit, sport, tree, bird, vegetable, shape, kitchen, Water transportation, sky transportation, insects, and others. In our CIL experiments, we use 60 classes from the superclasses with an adequate number of instances ( $> 150$ ): furniture, mammal, tool, cloth, electricity, and road transportation. To the best of our knowledge, this is the first time such a dataset is considered for CIL problems. Table 3 summarizes the DomainNet classes we use for the CIL experiments. To build the 50-shot CIL setting of Section 4.3, we randomly sample 50 images per class and the rest of the images are used for evaluation.

The iNaturalist is another large-scale dataset, comprising  $\sim 2.7$  million images of 10,000 species. The species can be divided into 10 general categories: amphibians, animalia, arachnids, birds, fungi, insects, mammals, mollusks, plants, and reptiles. Due to the dataset’s large size, we have opted to use the “mini” version of the training dataset<sup>1</sup> which has 50 images per class, and thus, this is the only dataset from the few-shot CIL experiments that we do not repeat for 5 times

<sup>1</sup>We use the data from the 2021 competition, available at [https://github.com/visipedia/inat\\_comp/tree/master/2021](https://github.com/visipedia/inat_comp/tree/master/2021).

| Datasets            | # Classes                  | # Train instances | ALL | CIL |
|---------------------|----------------------------|-------------------|-----|-----|
| Caltech101 [6]      | 102                        | 3,060             | ✓   | ✗   |
| CIFAR100 [14]       | 100                        | 50,000            | ✓   | ✓   |
| Flowers102 [20]     | 102                        | 1,020             | ✓   | ✗   |
| Pets [21]           | 37                         | 3,680             | ✓   | ✗   |
| Sun397 [28]         | 397                        | 76,127            | ✓   | ✗   |
| SVHN [19]           | 10                         | 73,257            | ✓   | ✓   |
| DTD [4]             | 47                         | 1,880             | ✓   | ✗   |
| EuroSAT [8]         | 10                         | 27,000            | ✓   | ✗   |
| Resics45 [3]        | 45                         | 31,500            | ✓   | ✗   |
| Patch Camelyon [26] | 2                          | 262,144           | ✓   | ✗   |
| Retinopathy [11]    | 5                          | 35,126            | ✓   | ✗   |
| CLEVR-count [10]    | 8                          | 70,000            | ✓   | ✗   |
| CLEVR-dist [10]     | 6                          | 70,000            | ✓   | ✗   |
| dSprites-loc [18]   | 16                         | 737,280           | ✓   | ✓   |
| dSprites-ori [18]   | 16                         | 737,280           | ✓   | ✗   |
| SmallNORB-azi [15]  | 18                         | 24,300            | ✓   | ✗   |
| SmallNORB-elev [15] | 9                          | 24,300            | ✓   | ✗   |
| DMLab [1]           | 6                          | 65,550            | ✓   | ✗   |
| KITTI-dist [7]      | 4                          | 6,347             | ✓   | ✗   |
| FGVC-Aircraft [17]  | 100                        | 6,667             | ✓   | ✓   |
| Cars [13]           | 196                        | 8,144             | ✓   | ✓   |
| Letters [5]         | 62                         | 74,107            | ✓   | ✓   |
| DomainNet [23]      | 60 (345 <sup>†</sup> )     | 569,010           | ✗   | ✓   |
| iNaturalist [25]    | 100 (10,000 <sup>†</sup> ) | 500,000           | ✗   | ✓   |
| Core50 [16]         | 50                         | 119,894           | ✓   | ✓   |
| CUB200 [27]         | 200                        | 11,788            | ✗   | ✓   |

Table 1. Information concerning all datasets used in the experiments. † denotes the number of classes of the original dataset before they are modified for the continual learning scenarios (see Section II for more details). The first 22 datasets form the VTAB+ collection. We also indicate whether a dataset has been used in the offline experiments in Section 4.2 of the main paper which use all the available training data (ALL). Similarly, we indicate which datasets are considered for the Class-Incremental Learning settings in Section 4.

since the (mini) train dataset is already in a 50-shot setting. For evaluation, we use the validation data with 10 images per class. The number of classes considered for the CIL experiments is reduced from 10,000 to 100; 10 classes per superclass (10 superclasses/sessions). Specific details are given in Tables 4 and 5.

### III. Extra Training Details

Due to the large number of experiments and datasets we tried to keep the hyperparameter tuning to a minimum by choosing a set of hyperparameters that works fairly well across all datasets and settings. We have not used any data augmentation in our experiments and all images have been scaled to  $224 \times 224$  pixels. The only exception is the experiments on CIFAR100, and CUB200 under the few-shot+ setting. There, for com-

parability reasons, we followed the exact experimental settings as in [31] where standard data augmentation techniques (e.g. random flips and crops) were utilized. Moreover, when we used ResNet-20 for CIFAR100 we maintained the original image size ( $32 \times 32$ ).

**Computing Infrastructure Details & Code.** All the experiments of Section 4 have been carried out on a Linux machine with a single NVIDIA-A100 (80GB memory) GPU. Our PyTorch-based code will be made available via a public repository after the review period.

**Optimization Details.** In all experiments, we train the models using a batch size of 256. Apart from GDumb, for the rest of the methods, EfficientNet-B0

| CIL setting | Datasets      | $S$ | $N_1$      | $ \mathcal{Y}_1 $ | $N_s$      | $ \mathcal{Y}_s $ |
|-------------|---------------|-----|------------|-------------------|------------|-------------------|
| High-shot   | CIFAR100      | 10  | 5k         | 10                | 5k         | 10                |
|             | SVHN          | 5   | $\sim 19k$ | 2                 | $\sim 14k$ | 2                 |
|             | dSprites-loc  | 7   | 24k        | 4                 | 12k        | 2                 |
|             | FGVC-Aircraft | 10  | 667        | 10                | $\sim 670$ | 10                |
|             | Cars          | 10  | 652        | 15                | $\sim 830$ | 20                |
|             | Letters       | 11  | $\sim 11k$ | 12                | $\sim 5k$  | 5                 |
|             | Core50        | 9   | $\sim 24k$ | 10                | $\sim 12k$ | 5                 |
| Few-shot+   | CIFAR100      | 9   | 30k        | 60                | 25         | 5                 |
|             | CUB200        | 11  | 3k         | 100               | 50         | 10                |
| Few-shot    | CIFAR100      | 9   | 1k         | 20                | 500        | 10                |
|             | SVHN          | 5   | 100        | 2                 | 100        | 2                 |
|             | dSprites-loc  | 7   | 200        | 4                 | 100        | 2                 |
|             | FGVC-Aircraft | 9   | 1k         | 20                | 500        | 10                |
|             | Cars          | 9   | 1484       | 36                | $\sim 830$ | 20                |
|             | Letters       | 11  | 600        | 12                | 250        | 5                 |
|             | DomainNet     | 9   | 600        | 12                | 300        | 6                 |
| iNaturalist | 9             | 1k  | 20         | 500               | 10         |                   |

Table 2. Detailed CIL settings for the experiments of Section 4.3. We report the total number of sessions ( $S$ ), the number of train instances ( $N_1$ ), and the number of classes ( $|\mathcal{Y}_1|$ ) of the first session and the rest of the sessions ( $N_s, |\mathcal{Y}_s|, s > 1$ ).

backbones are optimized with the Adam optimizer [12] while for ResNet architectures we opt for SGD with momentum set to 0.9. For GDumb, we follow [24] and we use SGD with momentum. For FACT [31] and FSA with pre-trained EfficientNet-B0 backbone, we set the initial learning rate to 0.0001 with scheduled decays by a factor of 0.5 every 50 epochs while for FSA-FiLM, we set it to 0.005. We train all full-body adaptation methods for 200 epochs and the FSA-FiLM for 150 epochs (except for the high-shot setting where we use 200 epochs for fair time comparisons). For the few-shot+ CIL scenario, we follow the training setup of [31]. The weights of the pre-trained EfficientNet-B0 have been obtained from <https://github.com/lukemelas/EfficientNet-PyTorch> while for the pre-trained weights of ResNet-18 and ConvNext, we use the following repository <https://github.com/rwightman/pytorch-image-models>.

**Competitors.** We found empirically that the recommended hyperparameter values (learning rates, cut-mix parameters, SGDR schedule) for GDumb in [24] work well in practice and we use these throughout the experiments. Similarly, for FACT, we use the default values  $\alpha = 0.5, \gamma = 0.01, V =$  number of new classes in total [31]. For ALICE, following [22], the projection head is a two-layer MLP with a hidden feature size of 2048 and ReLU as the ac-

tivation function. All the other hyperparameters (scale factor  $s$ , margin  $m$ , etc.) are set as in [22]. For E-EWC+SDC, a triplet loss [9] is used as in [29] and the final embeddings of 640 dimensions are normalized.

## IV. Additional Results

In this section, we provide tables with the exact accuracies for each one of the datasets used in the experiments under different settings. We have run extra experiments on VTAB+ using meta-learned FiLM adapters in the offline setting and we report accuracies. Additionally, we perform a comparison between different backbones in the offline setting: EfficientNet-B0 and ResNet-18. For the high-shot setting, apart from the four datasets utilized in the main paper, we also deploy the methods on SVHN and present accuracies by session. Finally, accuracies at each session for all three CIL settings are provided.

**Head Comparison.** Here we provide the exact accuracies for each dataset based on Section 4.2 and Figure 1. Tables 6, 7, 8, and 9 give the offline accuracies for the no adaptation (NA) method for 5, 10, 50 shots, and all training data, respectively. Similar information for the FiLM adaptation method (A-FiLM) is given in Tables 10, 11, 12, and 13. Finally, Tables 14, 15, 16, and 17 provide the corresponding accuracies for the full-body adaptation method (A-FB).

**Meta-learned FiLM Adapters.** We consider experiments in the offline setting with meta-learned FiLM adapters. We use the meta-trained FiLM adapters as presented in [2]. The results for meta-learned FiLM adapters, as well as for no-adaptation (NA), FiLM (fine-tuned) adaptation (FiLM), and full body adaptation methods, are summarized in Tables 21, 22, and 23, for 5, 10, and 50 shots, respectively. We observe that the meta-trained FiLM adapters work better than NA in all cases, but they fail to compete with the fine-tuned FiLM adapters. Notice that as the number of shots increases, the accuracy difference between meta-learned and fine-tuned FiLM adapters also increases.

**FiLM Adaptation: EfficientNet-B0 vs ResNet-18.** To assess how different backbone architectures affect the performance of the no-adaptation and FiLM adaptation method, we compare ResNet-18 and EfficientNet-B0 (EN) backbones in Tables 18, 19, and 20, for 5, 10, and 50 shots, respectively. All tables demonstrate the superiority of EfficientNet-B0, regardless of the adaptation method. The tables also show that, regardless of backbone architecture and number

| Domain       | Clipart         | Infograph      | Painting        | Quickdraw         | Real            | Sketch              |
|--------------|-----------------|----------------|-----------------|-------------------|-----------------|---------------------|
| Superclass   | Furniture       | Mammal         | Tool            | Cloth             | Electricity     | Road Transportation |
| Classes      | Clipart         | Infograph      | Painting        | Quickdraw         | Real            | Sketch              |
|              | Furniture       | Mammal         | Tool            | Cloth             | Electricity     | Road Transportation |
|              | Couch (1)       | Cat (11)       | Anvil (21)      | Belt (31)         | Calculator (41) | Ambulance (51)      |
|              | Fence (2)       | Dolphin (12)   | Basket (22)     | Camouflage (32)   | Computer (42)   | Bus (52)            |
|              | Streetlight (3) | Squirrel (13)  | Rifle (23)      | Eyeglasses (33)   | Fan (43)        | Motorbike (53)      |
|              | Table (4)       | Zebra (14)     | Axe (24)        | Helmet (34)       | Oven (44)       | Train (54)          |
|              | Toothbrush (5)  | Cow (15)       | Dumbbell (25)   | Necklace (35)     | Dishwasher (45) | Bicycle (55)        |
|              | Vase (6)        | Elephant (16)  | Pliers (26)     | Rollerskates (36) | Headphones (46) | Car (56)            |
|              | Bed (7)         | Pig (17)       | Saw (27)        | Sock (37)         | Microwave (47)  | Truck (57)          |
|              | Fireplace (8)   | Tiger (18)     | Skateboard (28) | Underwear (38)    | Radio (48)      | Bulldozer (58)      |
| Teapot (9)   | Dog (19)        | Bandage (29)   | Bowtie (39)     | Stereo (49)       | Firetruck (59)  |                     |
| Lantern (10) | Rabbit (20)     | Paint Can (30) | Crown (40)      | Toaster (50)      | Tractor (60)    |                     |

Table 3. DomainNet classes (class id in parentheses) used for the few-shot CIL setting.

| Session | Superclass                                                                                                                                                                                                    |                                                                                                                                                                                                                                                       |                                                                                                                                                                                                                         |                                                                                                                                                                                                             |                                                                                                                                                                                                                                       |
|---------|---------------------------------------------------------------------------------------------------------------------------------------------------------------------------------------------------------------|-------------------------------------------------------------------------------------------------------------------------------------------------------------------------------------------------------------------------------------------------------|-------------------------------------------------------------------------------------------------------------------------------------------------------------------------------------------------------------------------|-------------------------------------------------------------------------------------------------------------------------------------------------------------------------------------------------------------|---------------------------------------------------------------------------------------------------------------------------------------------------------------------------------------------------------------------------------------|
|         | Amphibians<br>1                                                                                                                                                                                               | Animalia<br>2                                                                                                                                                                                                                                         | Arachnids<br>3                                                                                                                                                                                                          | Birds<br>4                                                                                                                                                                                                  | Fungi<br>5                                                                                                                                                                                                                            |
| Classes | Ascapus truei<br>Bombina orientalis<br>Bombina variegata<br>Anaxyrus americanus<br>Anaxyrus boreas<br>Anaxyrus cognatus<br>Anaxyrus fowleri<br>Anaxyrus punctatus<br>Anaxyrus quercicus<br>Anaxyrus speciosus | Lumbricus terrestris<br>Sabella spallanzanii<br>Serpula columbiana<br>Spirobranchus cariniferus<br>Hemiscolopendra marginata<br>Scolopendra cingulata<br>Scolopendra heros<br>Scolopendra polymorpha<br>Scutigera coleoptrata<br>Ommatoiulus moreleti | Eratigena duellia<br>Atypoides riversi<br>Aculepeira ceropegia<br>Agalenatea redii<br>Araneus bicentenarius<br>Araneus diadematus<br>Araneus marmoreus<br>Araneus quadratus<br>Araneus trifolium<br>Aranella displicata | Accipiter badius<br>Accipiter cooperii<br>Accipiter gentilis<br>Accipiter nisus<br>Accipiter striatus<br>Accipiter trivirgatus<br>Aegyptius monachus<br>Aquila audax<br>Aquila chrysaetos<br>Aquila heliaca | Herpothallon rubrocinctum<br>Chrysothrix candelaris<br>Apiosporina morbosa<br>Acarospora socialis<br>Physcia adscendens<br>Physcia aipollia<br>Physcia millegrana<br>Physcia stellaris<br>Candelaria concolor<br>Cladonia chlorophaea |

Table 4. Classes used from iNaturalist to create the few-shot CIL setting. (table continues to Table 5).

of shots, FiLM adaptation provides significant performance benefits.

**High-shot CIL: Accuracies per Session.** We provide detailed accuracies for each incremental session for all baselines in the high-shot CIL setting. The accuracies for CIFAR100, CORE50, SVHN, dSprites-loc, FGVC-Aircraft, Cars, and Letters can be found in Tables 24, 25, 26, 27, 28, 29, and 30, respectively. For GDumb, we provide results with a memory buffer of size 1k and 5k.

**Few-shot+ CIL: Accuracies per Session.** We provide detailed accuracy for each incremental session for all baselines in the few-shot+ CIL setting. The accuracies for CIFAR100 and CUB200 can be found in Tables 31 and 32, respectively.

**Few-shot CIL: Accuracies per Session.** We provide detailed accuracy (+ error bars) for each incremental session for all baselines in the few-shot CIL setting. The accuracies for CIFAR100, SVHN, dSprites-location, FGVC-Aircraft, Letters, DomainNet, and iNaturalist can be found in Tables 33, 34, 35, 36, 37, 38, and 39, respectively.

**FSA-FiLM vs GDumb** The trade-off between accuracy and training time for different continual learning methods on CIFAR100 and CORE50 is illustrated in Fig. 1. Several different memory sizes are used for GDumb. FSA-FiLM attains the highest accuracy (and the lowest PPDR)  $\approx 13.5x$  faster than GDumb with a 5k memory buffer on CIFAR100 while on CORE50, GDumb requires at least a 5K memory buffer to outperform FSA-FiLM and  $\approx 3x$  more training time than FSA-FiLM. Notice that FACT is unable to perform well under this setting due to the small number of available classes in the first session.

| Session | Superclass                                                                                                                                                                                                                                 |                                                                                                                                                                                                                                   |                                                                                                                                                                                                          |                                                                                                                                                                                                                                           |                                                                                                                                                                                                                                 |
|---------|--------------------------------------------------------------------------------------------------------------------------------------------------------------------------------------------------------------------------------------------|-----------------------------------------------------------------------------------------------------------------------------------------------------------------------------------------------------------------------------------|----------------------------------------------------------------------------------------------------------------------------------------------------------------------------------------------------------|-------------------------------------------------------------------------------------------------------------------------------------------------------------------------------------------------------------------------------------------|---------------------------------------------------------------------------------------------------------------------------------------------------------------------------------------------------------------------------------|
|         | Insects<br>6                                                                                                                                                                                                                               | Mammals<br>7                                                                                                                                                                                                                      | Mollusks<br>8                                                                                                                                                                                            | Plants<br>9                                                                                                                                                                                                                               | Reptiles<br>10                                                                                                                                                                                                                  |
| Classes | Aptera fusca<br>Panchlora nivea<br>Pycnoscelus surinamensis<br>Blatta orientalis<br>Periplaneta americana<br>Periplaneta australasiae<br>Periplaneta fuliginosa<br>Pseudomops septentrionalis<br>Arrhenodes minutus<br>Agrilus planipennis | Antilocapra americana<br>Balaenoptera acutorostrata<br>Megaptera novaeangliae<br>Aepyceros melampus<br>Alcelaphus buselaphus<br>Antidorcas marsupialis<br>Bison bison<br>Bos taurus<br>Boselaphus tragocamelus<br>Bubalus bubalis | Ensis leei<br>Clinocardium nuttallii<br>Dinocardium robustum<br>Tridacna maxima<br>Donax gouldii<br>Donax variabilis<br>Dreissena polymorpha<br>Mya arenaria<br>Cyrtopleura costata<br>Geukensia demissa | Bryum argenteum<br>Rhodobryum ontariense<br>Leucolepis acanthoneura<br>Plagiomnium cuspidatum<br>Plagiomnium insigne<br>Rhizomnium glabrescens<br>Dicranum scoparium<br>Ceratodon purpureus<br>Leucobryum glaucum<br>Funaria hygrometrica | Alligator mississippiensis<br>Caiman crocodilus<br>Crocodylus acutus<br>Crocodylus moreletii<br>Crocodylus niloticus<br>Crocodylus porosus<br>Sphenodon punctatus<br>Acanthocercus atricollis<br>Agama atra<br>Agama picticauda |

Table 5. Classes used from iNaturalist to create the few-shot CIL setting. The first part can be found in Table 4.

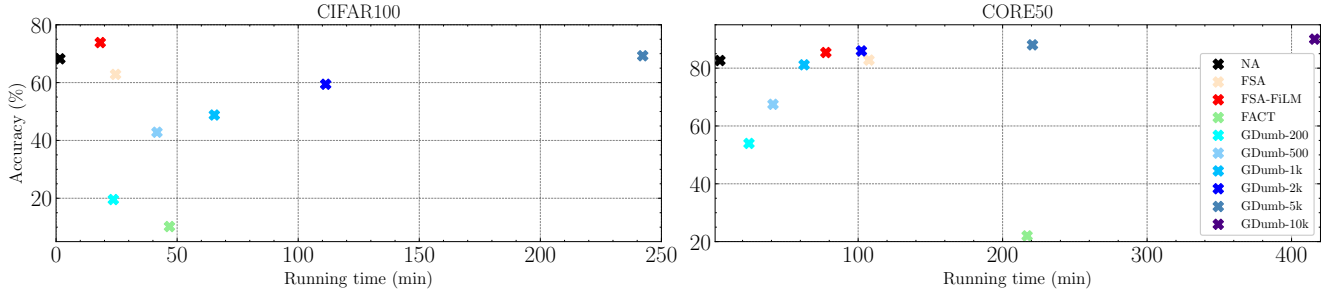

Figure 1. Last session’s test accuracy ( $\uparrow$ ) and run time ( $\downarrow$ ) for the “high-shot CIL” setting. GDumb- $m$  refers to memory buffer sizes  $m \in \{200, 500, 1k, 2k, 5k, 10k^*\}$ . We use a memory buffer of 10k images only for CORE50.

| Dataset        | NCM                   | LDA                   | Linear                |
|----------------|-----------------------|-----------------------|-----------------------|
| Caltech101     | 85.7 $\pm$ 0.9        | <b>88.2</b> $\pm$ 0.8 | 87.2 $\pm$ 0.7        |
| CIFAR100       | 40.2 $\pm$ 1.5        | <b>42.7</b> $\pm$ 1.6 | 42.3 $\pm$ 1.3        |
| Flowers102     | 71.5 $\pm$ 0.6        | <b>76.1</b> $\pm$ 0.4 | 75.7 $\pm$ 0.8        |
| Pets           | <b>83.0</b> $\pm$ 1.5 | 82.4 $\pm$ 1.6        | 82.5 $\pm$ 1.5        |
| Sun397         | 41.0 $\pm$ 0.9        | 41.9 $\pm$ 1.0        | <b>42.9</b> $\pm$ 0.7 |
| SVHN           | 13.5 $\pm$ 1.6        | <b>16.5</b> $\pm$ 1.1 | 15.0 $\pm$ 1.4        |
| DTD            | 48.2 $\pm$ 1.0        | 48.9 $\pm$ 1.7        | <b>49.2</b> $\pm$ 1.8 |
| EuroSAT        | 72.1 $\pm$ 1.9        | <b>76.3</b> $\pm$ 1.8 | 74.6 $\pm$ 2.0        |
| Resics45       | 55.2 $\pm$ 1.2        | 58.8 $\pm$ 1.4        | <b>58.9</b> $\pm$ 1.2 |
| Patch Camelyon | 59.6 $\pm$ 8.7        | <b>59.8</b> $\pm$ 7.2 | 59.0 $\pm$ 6.4        |
| Retinopathy    | <b>26.3</b> $\pm$ 2.5 | 25.6 $\pm$ 1.6        | 24.3 $\pm$ 1.7        |
| CLEVR-count    | 22.2 $\pm$ 0.8        | <b>23.1</b> $\pm$ 1.1 | 22.6 $\pm$ 0.7        |
| CLEVR-dist     | 23.0 $\pm$ 2.7        | <b>24.5</b> $\pm$ 2.3 | 24.4 $\pm$ 2.2        |
| dSprites-loc   | 7.5 $\pm$ 0.7         | <b>8.5</b> $\pm$ 0.6  | 7.3 $\pm$ 0.6         |
| dSprites-ori   | 13.1 $\pm$ 1.2        | <b>16.2</b> $\pm$ 0.8 | 14.8 $\pm$ 1.1        |
| SmallNORB-azi  | 6.8 $\pm$ 0.6         | <b>9.3</b> $\pm$ 0.8  | 8.8 $\pm$ 1.0         |
| SmallNORB-elev | 13.0 $\pm$ 1.5        | <b>15.1</b> $\pm$ 0.6 | 14.5 $\pm$ 0.9        |
| DMLab          | 22.2 $\pm$ 0.8        | 22.1 $\pm$ 1.3        | <b>23.8</b> $\pm$ 0.8 |
| KITTI-dist     | 50.0 $\pm$ 1.3        | 51.4 $\pm$ 2.7        | <b>51.9</b> $\pm$ 3.1 |
| FGVC-Aircraft  | 19.4 $\pm$ 0.6        | 22.1 $\pm$ 1.0        | <b>22.7</b> $\pm$ 0.6 |
| Cars           | 20.0 $\pm$ 0.6        | <b>22.6</b> $\pm$ 0.6 | 22.0 $\pm$ 0.7        |
| Letters        | 28.3 $\pm$ 1.8        | <b>36.1</b> $\pm$ 2.1 | 34.0 $\pm$ 1.3        |
| Average acc    | 37.4                  | <b>39.5</b>           | 39.0                  |

Table 6. Accuracy comparison between NCM, LDA, and Linear head without using any adaptation (NA method). The reported results are based on 5 shots and averaged over 5 runs (mean $\pm$ std). A pre-trained EfficientNet-B0 is used as a backbone in all cases.

| Dataset        | NCM                   | LDA                   | Linear                |
|----------------|-----------------------|-----------------------|-----------------------|
| Caltech101     | 88.5 $\pm$ 0.9        | <b>90.0</b> $\pm$ 0.8 | 89.6 $\pm$ 0.7        |
| CIFAR100       | 45.8 $\pm$ 1.0        | <b>50.1</b> $\pm$ 1.5 | 49.2 $\pm$ 1.1        |
| Flowers102     | 77.2 $\pm$ 0.2        | <b>83.9</b> $\pm$ 0.3 | 81.9 $\pm$ 0.2        |
| Pets           | 85.8 $\pm$ 1.0        | <b>86.4</b> $\pm$ 0.7 | 86.1 $\pm$ 0.5        |
| Sun397         | 47.1 $\pm$ 1.3        | 49.0 $\pm$ 1.3        | <b>49.7</b> $\pm$ 0.8 |
| SVHN           | 15.5 $\pm$ 2.3        | <b>19.4</b> $\pm$ 2.9 | 18.1 $\pm$ 2.6        |
| DTD            | 53.8 $\pm$ 0.3        | 55.6 $\pm$ 0.6        | <b>56.3</b> $\pm$ 0.7 |
| EuroSAT        | 76.6 $\pm$ 1.2        | <b>82.1</b> $\pm$ 0.9 | 80.2 $\pm$ 0.9        |
| Resics45       | 60.7 $\pm$ 1.3        | 65.5 $\pm$ 1.1        | <b>65.9</b> $\pm$ 1.2 |
| Patch Camelyon | 63.0 $\pm$ 5.3        | <b>66.5</b> $\pm$ 3.7 | 65.3 $\pm$ 4.7        |
| Retinopathy    | <b>27.5</b> $\pm$ 3.2 | 27.1 $\pm$ 2.2        | 26.1 $\pm$ 1.8        |
| CLEVR-count    | 24.0 $\pm$ 0.4        | <b>25.7</b> $\pm$ 0.6 | 24.9 $\pm$ 0.6        |
| CLEVR-dist     | 24.2 $\pm$ 1.2        | <b>26.3</b> $\pm$ 1.1 | 26.3 $\pm$ 1.4        |
| dSprites-loc   | 7.5 $\pm$ 0.5         | <b>8.7</b> $\pm$ 0.3  | 7.9 $\pm$ 0.3         |
| dSprites-ori   | 14.2 $\pm$ 0.9        | <b>18.2</b> $\pm$ 0.7 | 16.4 $\pm$ 1.0        |
| SmallNORB-azi  | 8.4 $\pm$ 0.4         | 9.5 $\pm$ 1.1         | <b>9.5</b> $\pm$ 0.7  |
| SmallNORB-elev | 13.6 $\pm$ 0.8        | <b>16.5</b> $\pm$ 1.1 | 16.2 $\pm$ 0.7        |
| DMLab          | 25.1 $\pm$ 1.1        | 25.7 $\pm$ 1.2        | <b>27.2</b> $\pm$ 1.3 |
| KITTI-dist     | 50.1 $\pm$ 0.8        | <b>52.9</b> $\pm$ 1.5 | 52.0 $\pm$ 1.8        |
| FGVC-Aircraft  | 23.1 $\pm$ 0.4        | <b>28.5</b> $\pm$ 0.4 | 27.0 $\pm$ 0.4        |
| Cars           | 25.4 $\pm$ 0.5        | 30.4 $\pm$ 0.5        | <b>30.7</b> $\pm$ 0.4 |
| Letters        | 34.2 $\pm$ 0.8        | <b>45.6</b> $\pm$ 0.8 | 45.2 $\pm$ 1.4        |
| Average acc    | 40.5                  | <b>43.8</b>           | 43.3                  |

Table 7. Accuracy comparison between NCM, LDA, and Linear head without using any adaptation (NA method). The reported results are based on 10 shots and averaged over 5 runs (mean $\pm$ std). A pre-trained EfficientNet-B0 is used as a backbone in all cases.

| Dataset        | NCM            | LDA                   | Linear                |
|----------------|----------------|-----------------------|-----------------------|
| Caltech101     | 90.4 $\pm$ 0.6 | 91.9 $\pm$ 0.5        | <b>93.0</b> $\pm$ 0.4 |
| CIFAR100       | 52.0 $\pm$ 0.9 | 57.4 $\pm$ 1.0        | <b>60.9</b> $\pm$ 1.0 |
| Flowers102     | 77.2 $\pm$ 0.2 | <b>83.9</b> $\pm$ 0.3 | 81.9 $\pm$ 0.2        |
| Pets           | 88.2 $\pm$ 0.3 | 89.5 $\pm$ 0.4        | <b>89.9</b> $\pm$ 0.6 |
| Sun397         | 52.6 $\pm$ 1.1 | 55.9 $\pm$ 1.0        | <b>58.4</b> $\pm$ 0.8 |
| SVHN           | 19.3 $\pm$ 1.7 | 28.3 $\pm$ 1.1        | <b>28.9</b> $\pm$ 1.1 |
| DTD            | 58.5 $\pm$ 0.0 | 61.1 $\pm$ 0.0        | <b>65.4</b> $\pm$ 0.2 |
| EuroSAT        | 81.7 $\pm$ 0.6 | 87.7 $\pm$ 0.9        | <b>88.2</b> $\pm$ 0.7 |
| Resics45       | 66.6 $\pm$ 0.7 | 73.5 $\pm$ 0.9        | <b>78.2</b> $\pm$ 0.7 |
| Patch Camelyon | 70.9 $\pm$ 5.4 | <b>76.2</b> $\pm$ 1.1 | 76.2 $\pm$ 1.5        |
| Retinopathy    | 29.2 $\pm$ 2.2 | <b>32.9</b> $\pm$ 2.2 | 32.9 $\pm$ 1.9        |
| CLEVR-count    | 26.3 $\pm$ 1.5 | 30.1 $\pm$ 1.0        | <b>31.2</b> $\pm$ 1.0 |
| CLEVR-dist     | 27.8 $\pm$ 0.8 | <b>32.2</b> $\pm$ 1.1 | 31.7 $\pm$ 1.0        |
| dSprites-loc   | 9.3 $\pm$ 0.8  | <b>11.9</b> $\pm$ 0.4 | 9.9 $\pm$ 0.6         |
| dSprites-ori   | 14.9 $\pm$ 0.5 | <b>20.1</b> $\pm$ 1.1 | 18.7 $\pm$ 2.2        |
| SmallNORB-azi  | 9.5 $\pm$ 0.6  | <b>12.3</b> $\pm$ 0.8 | 12.1 $\pm$ 1.1        |
| SmallNORB-elev | 15.2 $\pm$ 1.3 | 19.1 $\pm$ 0.7        | <b>20.0</b> $\pm$ 0.5 |
| DMLab          | 29.1 $\pm$ 0.3 | 30.6 $\pm$ 0.3        | <b>32.3</b> $\pm$ 0.7 |
| KITTI-dist     | 53.2 $\pm$ 0.9 | <b>61.4</b> $\pm$ 2.3 | 60.7 $\pm$ 3.2        |
| FGVC-Aircraft  | 30.9 $\pm$ 0.5 | 41.0 $\pm$ 0.7        | <b>46.1</b> $\pm$ 0.6 |
| Cars           | 33.7 $\pm$ 0.0 | 43.3 $\pm$ 0.0        | <b>46.5</b> $\pm$ 0.2 |
| Letters        | 43.1 $\pm$ 1.0 | 57.6 $\pm$ 0.8        | <b>65.9</b> $\pm$ 1.1 |
| Average acc    | 44.5           | 49.9                  | <b>51.3</b>           |

Table 8. Accuracy comparison between NCM, LDA, and Linear head without using any adaptation (**NA** method). The reported results are based on **50** shots and averaged over 5 runs (mean $\pm$ std). A pre-trained EfficientNet-B0 is used as a backbone in all cases.

| Dataset        | NCM            | LDA                   | Linear                |
|----------------|----------------|-----------------------|-----------------------|
| Caltech101     | 90.4 $\pm$ 0.6 | 91.9 $\pm$ 0.5        | <b>93.0</b> $\pm$ 0.4 |
| CIFAR100       | 53.5 $\pm$ 1.6 | 68.2 $\pm$ 1.7        | <b>68.3</b> $\pm$ 0.8 |
| Flowers102     | 77.2 $\pm$ 0.2 | <b>83.9</b> $\pm$ 0.3 | 81.9 $\pm$ 0.3        |
| Pets           | 88.7 $\pm$ 0.2 | 89.9 $\pm$ 0.2        | <b>90.7</b> $\pm$ 0.3 |
| Sun397         | 53.9 $\pm$ 1.1 | 56.9 $\pm$ 1.2        | <b>58.4</b> $\pm$ 0.6 |
| SVHN           | 24.5 $\pm$ 0.4 | 36.8 $\pm$ 0.6        | <b>40.8</b> $\pm$ 0.8 |
| DTD            | 58.5 $\pm$ 0.0 | 61.1 $\pm$ 0.0        | <b>65.3</b> $\pm$ 0.3 |
| EuroSAT        | 82.4 $\pm$ 0.3 | 88.1 $\pm$ 0.1        | <b>93.2</b> $\pm$ 0.2 |
| Resics45       | 67.1 $\pm$ 0.2 | 74.6 $\pm$ 0.2        | <b>81.8</b> $\pm$ 0.4 |
| Patch Camelyon | 72.9 $\pm$ 0.0 | 79.1 $\pm$ 0.0        | <b>79.7</b> $\pm$ 0.5 |
| Retinopathy    | 33.0 $\pm$ 0.3 | 40.4 $\pm$ 0.3        | <b>46.9</b> $\pm$ 0.4 |
| CLEVR-count    | 28.9 $\pm$ 0.3 | 40.1 $\pm$ 0.4        | <b>50.3</b> $\pm$ 0.3 |
| CLEVR-dist     | 29.2 $\pm$ 0.5 | 38.7 $\pm$ 0.4        | <b>45.5</b> $\pm$ 1.3 |
| dSprites-loc   | 14.6 $\pm$ 0.6 | 20.9 $\pm$ 0.7        | <b>30.8</b> $\pm$ 1.4 |
| dSprites-ori   | 15.5 $\pm$ 0.4 | 22.5 $\pm$ 0.6        | <b>33.3</b> $\pm$ 0.9 |
| SmallNORB-azi  | 11.5 $\pm$ 0.5 | 14.1 $\pm$ 0.7        | <b>14.2</b> $\pm$ 0.7 |
| SmallNORB-elev | 19.3 $\pm$ 0.4 | 24.1 $\pm$ 0.5        | <b>26.3</b> $\pm$ 0.8 |
| DMLab          | 35.4 $\pm$ 0.4 | 39.7 $\pm$ 0.3        | <b>44.4</b> $\pm$ 0.4 |
| KITTI-dist     | 53.4 $\pm$ 0.0 | 66.7 $\pm$ 0.0        | <b>69.8</b> $\pm$ 0.4 |
| FGVC-Aircraft  | 31.8 $\pm$ 0.0 | 41.3 $\pm$ 0.0        | <b>45.8</b> $\pm$ 0.4 |
| Cars           | 33.7 $\pm$ 0.0 | 43.3 $\pm$ 0.0        | <b>46.6</b> $\pm$ 0.3 |
| Letters        | 44.9 $\pm$ 1.3 | 59.7 $\pm$ 0.5        | <b>69.5</b> $\pm$ 0.5 |
| Average acc    | 46.4           | 53.4                  | <b>58.0</b>           |

Table 9. Accuracy comparison between NCM, LDA, and Linear head without using any adaptation (**NA** method). The reported results are based on the full training dataset and averaged over 5 runs (mean $\pm$ std). A pre-trained EfficientNet-B0 is used as a backbone in all cases.

| Dataset                       | NCM                                     | LDA                                     | Linear                           |
|-------------------------------|-----------------------------------------|-----------------------------------------|----------------------------------|
| Caltech101                    | 86.6 $\pm$ 0.5                          | <b>89.0</b> $\pm$ 0.6                   | 88.5 $\pm$ 0.4                   |
| CIFAR100                      | 47.4 $\pm$ 1.2                          | <b>51.8</b> $\pm$ 1.3                   | 50.3 $\pm$ 1.4                   |
| Flowers102                    | 80.2 $\pm$ 0.4                          | <b>85.0</b> $\pm$ 0.8                   | 83.5 $\pm$ 0.5                   |
| Pets                          | 81.8 $\pm$ 1.5                          | 81.8 $\pm$ 1.7                          | <b>82.6</b> $\pm$ 1.6            |
| Sun397                        | 40.9 $\pm$ 0.7                          | <b>40.9</b> $\pm$ 0.7                   | 38.1 $\pm$ 1.0                   |
| SVHN                          | 28.6 $\pm$ 3.8                          | <b>31.7</b> $\pm$ 3.7                   | 30.1 $\pm$ 4.5                   |
| DTD                           | 49.6 $\pm$ 1.5                          | 50.2 $\pm$ 0.9                          | <b>50.8</b> $\pm$ 1.3            |
| EuroSAT                       | 75.8 $\pm$ 1.5                          | 78.1 $\pm$ 1.2                          | <b>78.3</b> $\pm$ 1.2            |
| Resics45                      | 62.7 $\pm$ 1.1                          | 64.7 $\pm$ 1.2                          | <b>65.8</b> $\pm$ 0.7            |
| Patch Camelyon<br>Retinopathy | 64.7 $\pm$ 5.8<br><b>27.4</b> $\pm$ 3.1 | <b>64.9</b> $\pm$ 6.6<br>26.0 $\pm$ 2.0 | 62.9 $\pm$ 5.4<br>25.2 $\pm$ 2.4 |
| CLEVR-count                   | <b>24.0</b> $\pm$ 1.3                   | 23.4 $\pm$ 1.4                          | 23.2 $\pm$ 0.7                   |
| CLEVR-dist                    | 23.1 $\pm$ 1.4                          | 23.1 $\pm$ 1.1                          | <b>24.0</b> $\pm$ 1.3            |
| dSprites-loc                  | 19.5 $\pm$ 1.8                          | <b>19.8</b> $\pm$ 2.0                   | 16.7 $\pm$ 5.9                   |
| dSprites-ori                  | 20.6 $\pm$ 1.6                          | <b>26.5</b> $\pm$ 0.8                   | 25.5 $\pm$ 1.4                   |
| SmallNORB-azi                 | 9.0 $\pm$ 1.0                           | 10.1 $\pm$ 0.6                          | <b>10.3</b> $\pm$ 0.6            |
| SmallNORB-elev                | 14.6 $\pm$ 0.9                          | 15.4 $\pm$ 0.7                          | <b>15.5</b> $\pm$ 0.8            |
| DMLab                         | 23.4 $\pm$ 2.3                          | 23.3 $\pm$ 1.9                          | <b>24.8</b> $\pm$ 0.9            |
| KITTI-dist                    | <b>55.7</b> $\pm$ 3.6                   | 52.7 $\pm$ 3.5                          | 53.2 $\pm$ 1.8                   |
| FGVC-Aircraft                 | 28.7 $\pm$ 0.7                          | 32.6 $\pm$ 0.9                          | <b>33.1</b> $\pm$ 1.3            |
| Cars                          | 22.7 $\pm$ 0.5                          | <b>28.1</b> $\pm$ 0.4                   | 27.2 $\pm$ 0.7                   |
| Letters                       | 52.2 $\pm$ 2.9                          | 55.9 $\pm$ 2.5                          | <b>56.4</b> $\pm$ 3.2            |
| Average acc                   | 42.7                                    | <b>44.3</b>                             | 43.9                             |

Table 10. Accuracy comparison between NCM, LDA, and Linear head using FiLM adaptation (**A-FiLM** method). The reported results are based on **5** shots and averaged over 5 runs (mean $\pm$ std). A pre-trained EfficientNet-B0 is used as a backbone in all cases.

| Dataset                       | NCM                                     | LDA                                     | Linear                           |
|-------------------------------|-----------------------------------------|-----------------------------------------|----------------------------------|
| Caltech101                    | 89.9 $\pm$ 0.2                          | <b>91.5</b> $\pm$ 0.4                   | 91.1 $\pm$ 0.6                   |
| CIFAR100                      | 59.2 $\pm$ 1.7                          | <b>62.8</b> $\pm$ 1.1                   | 60.6 $\pm$ 0.5                   |
| Flowers102                    | 86.2 $\pm$ 0.5                          | 91.1 $\pm$ 0.3                          | <b>91.2</b> $\pm$ 0.3            |
| Pets                          | 85.8 $\pm$ 1.0                          | 86.3 $\pm$ 0.8                          | <b>86.6</b> $\pm$ 0.8            |
| Sun397                        | 48.5 $\pm$ 0.8                          | <b>49.3</b> $\pm$ 0.6                   | 44.8 $\pm$ 1.2                   |
| SVHN                          | 40.3 $\pm$ 2.5                          | <b>45.3</b> $\pm$ 3.0                   | 43.9 $\pm$ 3.3                   |
| DTD                           | 58.3 $\pm$ 0.8                          | 59.1 $\pm$ 0.8                          | <b>59.2</b> $\pm$ 1.1            |
| EuroSAT                       | 81.9 $\pm$ 1.4                          | <b>84.4</b> $\pm$ 1.6                   | 83.5 $\pm$ 0.7                   |
| Resics45                      | 70.2 $\pm$ 1.1                          | 73.0 $\pm$ 1.3                          | <b>73.5</b> $\pm$ 0.7            |
| Patch Camelyon<br>Retinopathy | <b>69.2</b> $\pm$ 5.2<br>26.7 $\pm$ 1.3 | 68.5 $\pm$ 6.1<br><b>26.9</b> $\pm$ 1.1 | 67.1 $\pm$ 4.8<br>25.6 $\pm$ 1.0 |
| CLEVR-count                   | <b>30.1</b> $\pm$ 1.9                   | 27.6 $\pm$ 1.6                          | 29.2 $\pm$ 1.2                   |
| CLEVR-dist                    | 25.3 $\pm$ 1.7                          | 26.2 $\pm$ 1.3                          | <b>26.5</b> $\pm$ 0.7            |
| dSprites-loc                  | <b>26.2</b> $\pm$ 11.4                  | 26.1 $\pm$ 10.6                         | 24.2 $\pm$ 14.7                  |
| dSprites-ori                  | 26.7 $\pm$ 2.4                          | <b>34.0</b> $\pm$ 2.6                   | 33.8 $\pm$ 2.4                   |
| SmallNORB-azi                 | 11.0 $\pm$ 0.8                          | <b>11.7</b> $\pm$ 1.2                   | 11.3 $\pm$ 1.4                   |
| SmallNORB-elev                | 15.6 $\pm$ 0.7                          | 16.3 $\pm$ 0.4                          | <b>16.6</b> $\pm$ 0.3            |
| DMLab                         | 27.2 $\pm$ 1.9                          | 26.6 $\pm$ 1.5                          | <b>29.3</b> $\pm$ 1.7            |
| KITTI-dist                    | <b>56.7</b> $\pm$ 3.7                   | 55.4 $\pm$ 3.7                          | 56.2 $\pm$ 4.5                   |
| FGVC-Aircraft                 | 37.5 $\pm$ 0.7                          | 43.3 $\pm$ 1.1                          | <b>43.4</b> $\pm$ 1.5            |
| Cars                          | 36.3 $\pm$ 0.8                          | <b>43.1</b> $\pm$ 1.0                   | 42.1 $\pm$ 1.0                   |
| Letters                       | 64.0 $\pm$ 1.5                          | 67.5 $\pm$ 1.3                          | <b>68.1</b> $\pm$ 1.4            |
| Average acc                   | 48.8                                    | <b>50.7</b>                             | 50.4                             |

Table 11. Accuracy comparison between NCM, LDA, and Linear head using FiLM adaptation (**A-FiLM** method). The reported results are based on **10** shots and averaged over 5 runs (mean $\pm$ std). A pre-trained EfficientNet-B0 is used as a backbone in all cases.

| Dataset        | NCM                   | LDA                   | Linear                |
|----------------|-----------------------|-----------------------|-----------------------|
| Caltech101     | 93.4 $\pm$ 0.7        | <b>93.8</b> $\pm$ 0.5 | 93.5 $\pm$ 1.0        |
| CIFAR100       | 72.6 $\pm$ 0.7        | <b>73.8</b> $\pm$ 0.9 | 73.7 $\pm$ 0.5        |
| Flowers102     | 86.2 $\pm$ 0.5        | 91.1 $\pm$ 0.3        | <b>91.2</b> $\pm$ 0.3 |
| Pets           | 89.3 $\pm$ 0.6        | <b>89.9</b> $\pm$ 0.7 | 89.9 $\pm$ 0.7        |
| Sun397         | 58.5 $\pm$ 0.7        | 59.7 $\pm$ 0.6        | <b>60.8</b> $\pm$ 0.7 |
| SVHN           | 73.9 $\pm$ 1.1        | <b>77.2</b> $\pm$ 0.8 | 76.8 $\pm$ 1.0        |
| DTD            | 66.8 $\pm$ 0.3        | 68.4 $\pm$ 0.2        | <b>68.7</b> $\pm$ 0.7 |
| EuroSAT        | 91.0 $\pm$ 0.6        | 93.0 $\pm$ 0.6        | <b>93.2</b> $\pm$ 0.6 |
| Resics45       | 81.7 $\pm$ 0.2        | 83.4 $\pm$ 0.6        | <b>85.3</b> $\pm$ 0.6 |
| Patch Camelyon | <b>78.5</b> $\pm$ 2.0 | 77.9 $\pm$ 2.4        | 78.1 $\pm$ 2.4        |
| Retinopathy    | 34.2 $\pm$ 1.6        | <b>35.2</b> $\pm$ 1.2 | 33.5 $\pm$ 1.9        |
| CLEVR-count    | <b>56.8</b> $\pm$ 0.9 | 46.6 $\pm$ 1.1        | 53.1 $\pm$ 1.1        |
| CLEVR-dist     | 40.2 $\pm$ 1.8        | 38.8 $\pm$ 1.0        | <b>41.2</b> $\pm$ 1.5 |
| dSprites-loc   | 83.6 $\pm$ 5.4        | <b>83.7</b> $\pm$ 5.6 | 81.6 $\pm$ 5.9        |
| dSprites-ori   | 41.2 $\pm$ 0.8        | 52.1 $\pm$ 1.3        | <b>53.8</b> $\pm$ 1.4 |
| SmallNORB-azi  | 17.0 $\pm$ 0.8        | 16.8 $\pm$ 0.8        | <b>17.5</b> $\pm$ 1.0 |
| SmallNORB-elev | 23.1 $\pm$ 1.2        | 22.9 $\pm$ 0.5        | <b>24.0</b> $\pm$ 0.6 |
| DMLab          | 35.0 $\pm$ 0.6        | 34.6 $\pm$ 0.6        | <b>35.8</b> $\pm$ 0.4 |
| KITTI-dist     | <b>67.3</b> $\pm$ 2.1 | 66.8 $\pm$ 3.0        | 66.5 $\pm$ 2.7        |
| FGVC-Aircraft  | 60.6 $\pm$ 0.9        | 65.1 $\pm$ 0.7        | <b>68.0</b> $\pm$ 0.6 |
| Cars           | 60.9 $\pm$ 0.2        | 67.9 $\pm$ 0.2        | <b>74.5</b> $\pm$ 0.4 |
| Letters        | 76.7 $\pm$ 0.5        | 79.7 $\pm$ 0.4        | <b>81.9</b> $\pm$ 0.8 |
| Average acc    | 63.1                  | 64.5                  | <b>65.6</b>           |

Table 12. Accuracy comparison between NCM, LDA, and Linear head using FiLM adaptation (**A-FiLM** method). The reported results are based on **50** shots and averaged over 5 runs (mean $\pm$ std). A pre-trained EfficientNet-B0 is used as a backbone in all cases.

| Dataset        | NCM                   | LDA                   | Linear                |
|----------------|-----------------------|-----------------------|-----------------------|
| Caltech101     | 93.6 $\pm$ 0.4        | <b>94.4</b> $\pm$ 0.3 | 94.1 $\pm$ 0.6        |
| CIFAR100       | 77.4 $\pm$ 1.1        | 78.2 $\pm$ 1.1        | <b>82.1</b> $\pm$ 1.1 |
| Flowers102     | 88.6 $\pm$ 0.6        | <b>91.2</b> $\pm$ 0.4 | 90.6 $\pm$ 0.5        |
| Pets           | 90.2 $\pm$ 0.2        | 90.8 $\pm$ 0.3        | <b>91.0</b> $\pm$ 0.4 |
| Sun397         | 61.4 $\pm$ 0.5        | 62.1 $\pm$ 0.3        | <b>63.7</b> $\pm$ 0.9 |
| SVHN           | 92.9 $\pm$ 0.4        | 93.1 $\pm$ 0.4        | <b>95.1</b> $\pm$ 0.4 |
| DTD            | 64.8 $\pm$ 0.2        | 66.8 $\pm$ 0.5        | <b>67.6</b> $\pm$ 0.6 |
| EuroSAT        | 96.5 $\pm$ 0.3        | 97.2 $\pm$ 0.1        | <b>98.1</b> $\pm$ 0.3 |
| Resics45       | 88.0 $\pm$ 0.3        | 89.4 $\pm$ 0.4        | <b>94.2</b> $\pm$ 0.4 |
| Patch Camelyon | 84.3 $\pm$ 1.5        | <b>85.9</b> $\pm$ 1.2 | 85.8 $\pm$ 1.6        |
| Retinopathy    | 52.3 $\pm$ 0.7        | 52.6 $\pm$ 0.8        | <b>59.5</b> $\pm$ 0.8 |
| CLEVR-count    | 94.5 $\pm$ 0.2        | 93.5 $\pm$ 0.7        | <b>95.3</b> $\pm$ 0.6 |
| CLEVR-dist     | 79.3 $\pm$ 1.4        | 80.1 $\pm$ 2.3        | <b>84.5</b> $\pm$ 2.0 |
| dSprites-loc   | 98.0 $\pm$ 0.5        | 98.5 $\pm$ 0.6        | <b>99.3</b> $\pm$ 0.4 |
| dSprites-ori   | 69.8 $\pm$ 2.4        | 80.0 $\pm$ 0.8        | <b>90.7</b> $\pm$ 0.8 |
| SmallNORB-azi  | <b>26.1</b> $\pm$ 1.2 | 24.4 $\pm$ 0.6        | 23.5 $\pm$ 0.5        |
| SmallNORB-elev | 47.0 $\pm$ 0.9        | <b>47.9</b> $\pm$ 1.2 | 47.9 $\pm$ 1.4        |
| DMLab          | 60.2 $\pm$ 0.6        | 61.3 $\pm$ 0.5        | <b>65.8</b> $\pm$ 1.0 |
| KITTI-dist     | 78.5 $\pm$ 0.9        | <b>80.1</b> $\pm$ 1.1 | 79.7 $\pm$ 0.4        |
| FGVC-Aircraft  | 63.3 $\pm$ 0.2        | 67.5 $\pm$ 0.4        | <b>71.5</b> $\pm$ 0.5 |
| Cars           | 60.1 $\pm$ 0.1        | 67.3 $\pm$ 0.3        | <b>73.6</b> $\pm$ 0.3 |
| Letters        | 77.1 $\pm$ 0.3        | 81.7 $\pm$ 0.4        | <b>85.2</b> $\pm$ 0.3 |
| Average acc    | 74.7                  | 76.6                  | <b>79.0</b>           |

Table 13. Accuracy comparison between NCM, LDA, and Linear head using FiLM adaptation (**A-FiLM** method). The reported results are based on the full training dataset and averaged over 5 runs (mean $\pm$ std). A pre-trained EfficientNet-B0 is used as a backbone in all cases.



| Dataset        | NCM                   | LDA                   | Linear                |
|----------------|-----------------------|-----------------------|-----------------------|
| Caltech101     | 87.1 $\pm$ 0.6        | <b>89.4</b> $\pm$ 0.7 | 86.1 $\pm$ 0.9        |
| CIFAR100       | 48.1 $\pm$ 0.7        | <b>49.3</b> $\pm$ 1.1 | 49.2 $\pm$ 1.0        |
| Flowers102     | 81.5 $\pm$ 0.8        | 81.7 $\pm$ 0.6        | <b>83.6</b> $\pm$ 0.8 |
| Pets           | <b>80.9</b> $\pm$ 1.7 | 80.8 $\pm$ 1.7        | 71.1 $\pm$ 1.2        |
| Sun397         | 35.5 $\pm$ 0.3        | 35.2 $\pm$ 0.5        | <b>37.2</b> $\pm$ 0.3 |
| SVHN           | 19.1 $\pm$ 1.5        | <b>19.6</b> $\pm$ 1.2 | 19.2 $\pm$ 1.8        |
| DTD            | 48.4 $\pm$ 1.3        | <b>49.0</b> $\pm$ 1.3 | 41.6 $\pm$ 0.8        |
| EuroSAT        | 75.4 $\pm$ 4.1        | 76.7 $\pm$ 2.9        | <b>78.5</b> $\pm$ 1.2 |
| Resics45       | 61.7 $\pm$ 2.3        | 62.3 $\pm$ 2.5        | <b>63.5</b> $\pm$ 2.5 |
| Patch Camelyon | 59.2 $\pm$ 4.9        | 59.4 $\pm$ 4.9        | <b>60.5</b> $\pm$ 7.0 |
| Retinopathy    | 24.6 $\pm$ 2.7        | 24.5 $\pm$ 2.5        | <b>26.1</b> $\pm$ 2.4 |
| CLEVR-count    | 23.9 $\pm$ 2.9        | 23.5 $\pm$ 3.0        | <b>24.2</b> $\pm$ 3.1 |
| CLEVR-dist     | 25.1 $\pm$ 3.3        | 25.6 $\pm$ 3.5        | <b>25.6</b> $\pm$ 2.4 |
| dSprites-loc   | 26.1 $\pm$ 2.7        | <b>27.1</b> $\pm$ 1.6 | 25.5 $\pm$ 3.6        |
| dSprites-ori   | 18.3 $\pm$ 1.6        | <b>19.9</b> $\pm$ 1.5 | 15.6 $\pm$ 1.9        |
| SmallNORB-azi  | 10.0 $\pm$ 0.7        | <b>10.4</b> $\pm$ 0.8 | 10.3 $\pm$ 0.9        |
| SmallNORB-elev | 15.8 $\pm$ 1.1        | <b>16.2</b> $\pm$ 1.1 | 15.6 $\pm$ 0.8        |
| DMLab          | 21.3 $\pm$ 1.6        | 22.1 $\pm$ 1.3        | <b>22.6</b> $\pm$ 0.9 |
| KITTI-dist     | 51.1 $\pm$ 2.5        | <b>52.8</b> $\pm$ 2.5 | 52.1 $\pm$ 2.0        |
| FGVC-Aircraft  | 23.8 $\pm$ 0.7        | 23.6 $\pm$ 0.8        | <b>25.1</b> $\pm$ 1.0 |
| Cars           | 23.1 $\pm$ 0.3        | 23.5 $\pm$ 0.3        | <b>25.3</b> $\pm$ 0.5 |
| Letters        | 35.5 $\pm$ 3.3        | 35.7 $\pm$ 3.3        | <b>37.0</b> $\pm$ 3.2 |
| Average acc    | 40.7                  | <b>41.3</b>           | 40.7                  |

Table 14. Accuracy comparison between NCM, LDA, and Linear head using full-body adaptation (**A-FB** method). The reported results are based on **5** shots and averaged over 5 runs (mean $\pm$ std). A pre-trained EfficientNet-B0 is used as a backbone in all cases.

| Dataset        | NCM                   | LDA                   | Linear                |
|----------------|-----------------------|-----------------------|-----------------------|
| Caltech101     | 90.4 $\pm$ 0.8        | <b>91.7</b> $\pm$ 0.7 | 89.3 $\pm$ 0.8        |
| CIFAR100       | 58.8 $\pm$ 0.4        | <b>59.5</b> $\pm$ 0.3 | 59.5 $\pm$ 0.8        |
| Flowers102     | 89.9 $\pm$ 0.6        | 90.0 $\pm$ 0.5        | <b>91.3</b> $\pm$ 0.6 |
| Pets           | 85.5 $\pm$ 0.9        | <b>85.7</b> $\pm$ 0.5 | 78.4 $\pm$ 1.7        |
| Sun397         | 45.2 $\pm$ 0.7        | 45.0 $\pm$ 0.4        | <b>46.3</b> $\pm$ 0.3 |
| SVHN           | 26.4 $\pm$ 3.4        | <b>27.1</b> $\pm$ 3.8 | 26.4 $\pm$ 3.6        |
| DTD            | 55.2 $\pm$ 0.8        | <b>56.7</b> $\pm$ 1.0 | 48.0 $\pm$ 0.8        |
| EuroSAT        | 83.9 $\pm$ 1.5        | 84.9 $\pm$ 1.5        | <b>86.3</b> $\pm$ 1.5 |
| Resics45       | 72.6 $\pm$ 1.2        | 72.8 $\pm$ 1.3        | <b>74.3</b> $\pm$ 1.1 |
| Patch Camelyon | 61.3 $\pm$ 4.5        | 61.2 $\pm$ 4.5        | <b>63.0</b> $\pm$ 5.1 |
| Retinopathy    | 25.1 $\pm$ 4.2        | 24.6 $\pm$ 3.3        | <b>27.5</b> $\pm$ 2.0 |
| CLEVR-count    | 28.0 $\pm$ 1.9        | 27.7 $\pm$ 2.0        | <b>28.7</b> $\pm$ 2.1 |
| CLEVR-dist     | <b>30.1</b> $\pm$ 4.1 | 30.0 $\pm$ 4.2        | 29.9 $\pm$ 3.6        |
| dSprites-loc   | 42.9 $\pm$ 2.7        | <b>44.8</b> $\pm$ 1.3 | 42.2 $\pm$ 3.1        |
| dSprites-ori   | 26.4 $\pm$ 6.5        | <b>29.6</b> $\pm$ 6.8 | 22.9 $\pm$ 10.4       |
| SmallNORB-azi  | <b>12.2</b> $\pm$ 0.6 | 11.5 $\pm$ 0.8        | 11.7 $\pm$ 0.6        |
| SmallNORB-elev | 18.2 $\pm$ 1.3        | <b>18.3</b> $\pm$ 1.5 | 17.3 $\pm$ 1.1        |
| DMLab          | 25.3 $\pm$ 1.2        | 25.6 $\pm$ 1.3        | <b>26.1</b> $\pm$ 1.1 |
| KITTI-dist     | 53.5 $\pm$ 2.3        | <b>54.9</b> $\pm$ 1.3 | 52.2 $\pm$ 2.1        |
| FGVC-Aircraft  | 37.4 $\pm$ 0.5        | 36.7 $\pm$ 0.6        | <b>38.6</b> $\pm$ 0.4 |
| Cars           | 43.8 $\pm$ 0.8        | 43.5 $\pm$ 0.6        | <b>46.9</b> $\pm$ 0.8 |
| Letters        | 55.8 $\pm$ 1.5        | 55.2 $\pm$ 1.3        | <b>56.6</b> $\pm$ 1.4 |
| Average acc    | 48.5                  | <b>49.0</b>           | 48.3                  |

Table 15. Accuracy comparison between NCM, LDA, and Linear head using full-body adaptation (**A-FB** method). The reported results are based on **10** shots and averaged over 5 runs (mean $\pm$ std). A pre-trained EfficientNet-B0 is used as a backbone in all cases.

| Dataset        | NCM                   | LDA                   | Linear                |
|----------------|-----------------------|-----------------------|-----------------------|
| Caltech101     | 92.8 $\pm$ 0.3        | <b>93.9</b> $\pm$ 0.3 | 92.6 $\pm$ 0.5        |
| CIFAR100       | 72.9 $\pm$ 0.9        | <b>73.1</b> $\pm$ 0.7 | 72.7 $\pm$ 0.8        |
| Flowers102     | 89.9 $\pm$ 0.6        | 90.0 $\pm$ 0.5        | <b>91.3</b> $\pm$ 0.6 |
| Pets           | 88.7 $\pm$ 0.5        | <b>89.6</b> $\pm$ 0.6 | 84.9 $\pm$ 1.1        |
| Sun397         | 59.9 $\pm$ 0.6        | 60.4 $\pm$ 0.6        | <b>62.4</b> $\pm$ 0.4 |
| SVHN           | 63.9 $\pm$ 1.5        | 64.5 $\pm$ 1.3        | <b>64.6</b> $\pm$ 1.6 |
| DTD            | 60.9 $\pm$ 0.3        | <b>64.4</b> $\pm$ 0.2 | 57.4 $\pm$ 0.7        |
| EuroSAT        | 93.8 $\pm$ 0.5        | <b>94.1</b> $\pm$ 0.6 | 93.9 $\pm$ 1.0        |
| Resics45       | 87.4 $\pm$ 0.8        | 87.6 $\pm$ 0.7        | <b>88.0</b> $\pm$ 0.8 |
| Patch Camelyon | 71.6 $\pm$ 1.7        | 72.2 $\pm$ 1.8        | <b>74.4</b> $\pm$ 1.8 |
| Retinopathy    | 31.1 $\pm$ 3.3        | 31.3 $\pm$ 2.9        | <b>31.9</b> $\pm$ 2.2 |
| CLEVR-count    | <b>46.5</b> $\pm$ 1.0 | 45.2 $\pm$ 1.1        | 45.4 $\pm$ 1.9        |
| CLEVR-dist     | 44.0 $\pm$ 2.1        | 44.7 $\pm$ 2.2        | <b>45.7</b> $\pm$ 2.2 |
| dSprites-loc   | 85.3 $\pm$ 4.0        | <b>87.1</b> $\pm$ 2.4 | 85.2 $\pm$ 3.2        |
| dSprites-ori   | 42.6 $\pm$ 3.2        | <b>44.8</b> $\pm$ 2.3 | 39.3 $\pm$ 4.7        |
| SmallNORB-azi  | <b>19.6</b> $\pm$ 0.6 | 18.3 $\pm$ 0.7        | 19.1 $\pm$ 1.1        |
| SmallNORB-elev | <b>31.4</b> $\pm$ 1.4 | 31.3 $\pm$ 1.7        | 31.3 $\pm$ 2.1        |
| DMLab          | 32.6 $\pm$ 1.4        | 32.7 $\pm$ 1.6        | <b>34.0</b> $\pm$ 0.9 |
| KITTI-dist     | 65.8 $\pm$ 2.1        | <b>66.9</b> $\pm$ 2.2 | 65.8 $\pm$ 1.8        |
| FGVC-Aircraft  | 74.2 $\pm$ 0.8        | 73.5 $\pm$ 0.4        | <b>74.6</b> $\pm$ 0.3 |
| Cars           | 79.3 $\pm$ 0.1        | 79.4 $\pm$ 0.1        | <b>81.5</b> $\pm$ 0.2 |
| Letters        | 82.1 $\pm$ 0.7        | 82.3 $\pm$ 0.9        | <b>83.1</b> $\pm$ 0.6 |
| Average acc    | 64.4                  | <b>64.9</b>           | 64.5                  |

Table 16. Accuracy comparison between NCM, LDA, and Linear head using full-body adaptation (**A-FB** method). The reported results are based on **50** shots and averaged over 5 runs (mean $\pm$ std). A pre-trained EfficientNet-B0 is used as a backbone in all cases.

| Dataset        | NCM                   | LDA                   | Linear                |
|----------------|-----------------------|-----------------------|-----------------------|
| Caltech101     | 94.2 $\pm$ 0.5        | 94.6 $\pm$ 0.3        | <b>94.8</b> $\pm$ 0.3 |
| CIFAR100       | 84.2 $\pm$ 1.2        | 84.3 $\pm$ 0.9        | <b>85.0</b> $\pm$ 1.1 |
| Flowers102     | 90.3 $\pm$ 0.3        | 90.3 $\pm$ 0.4        | <b>91.4</b> $\pm$ 0.5 |
| Pets           | 89.7 $\pm$ 0.4        | 89.5 $\pm$ 0.3        | <b>90.0</b> $\pm$ 0.4 |
| Sun397         | 65.9 $\pm$ 0.3        | 66.1 $\pm$ 1.0        | <b>66.7</b> $\pm$ 0.4 |
| SVHN           | <b>95.6</b> $\pm$ 0.2 | 95.3 $\pm$ 0.5        | 95.5 $\pm$ 0.3        |
| DTD            | 67.6 $\pm$ 0.8        | 68.1 $\pm$ 0.4        | <b>68.5</b> $\pm$ 0.5 |
| EuroSAT        | 98.1 $\pm$ 0.2        | 98.5 $\pm$ 0.3        | <b>98.6</b> $\pm$ 0.2 |
| Resics45       | 95.3 $\pm$ 0.1        | 95.5 $\pm$ 0.2        | <b>95.9</b> $\pm$ 0.1 |
| Patch Camelyon | 81.1 $\pm$ 2.2        | 85.0 $\pm$ 0.7        | <b>86.5</b> $\pm$ 0.9 |
| Retinopathy    | 55.8 $\pm$ 0.9        | 56.1 $\pm$ 1.4        | <b>57.7</b> $\pm$ 0.7 |
| CLEVR-count    | 98.5 $\pm$ 0.3        | <b>98.7</b> $\pm$ 0.3 | 98.3 $\pm$ 0.3        |
| CLEVR-dist     | 89.0 $\pm$ 0.6        | 89.0 $\pm$ 0.6        | <b>89.4</b> $\pm$ 1.5 |
| dSprites-loc   | 99.7 $\pm$ 0.3        | <b>99.8</b> $\pm$ 0.1 | 99.6 $\pm$ 0.4        |
| dSprites-ori   | 89.2 $\pm$ 1.0        | <b>94.0</b> $\pm$ 0.7 | 93.0 $\pm$ 1.1        |
| SmallNORB-azi  | <b>29.8</b> $\pm$ 1.0 | 28.7 $\pm$ 0.6        | 28.9 $\pm$ 0.8        |
| SmallNORB-elev | 74.3 $\pm$ 4.3        | <b>81.8</b> $\pm$ 3.1 | 77.2 $\pm$ 4.6        |
| DMLab          | 64.8 $\pm$ 0.6        | <b>65.7</b> $\pm$ 0.4 | 65.6 $\pm$ 0.7        |
| KITTI-dist     | 78.2 $\pm$ 0.7        | 82.1 $\pm$ 0.6        | <b>82.3</b> $\pm$ 1.1 |
| FGVC-Aircraft  | 76.0 $\pm$ 0.5        | 75.8 $\pm$ 0.7        | <b>76.7</b> $\pm$ 0.8 |
| Cars           | 79.1 $\pm$ 0.1        | 78.9 $\pm$ 0.2        | <b>81.3</b> $\pm$ 0.2 |
| Letters        | 86.0 $\pm$ 0.5        | 85.7 $\pm$ 0.5        | <b>87.2</b> $\pm$ 0.3 |
| Average acc    | 81.0                  | 82.0                  | <b>82.3</b>           |

Table 17. Accuracy comparison between NCM, LDA, and Linear head using full-body adaptation (**A-FB** method). The reported results are based on the full training dataset and averaged over 5 runs (mean $\pm$ std). A pre-trained EfficientNet-B0 is used as a backbone in all cases.

| Dataset        | NA(RN)    | FiLM(RN)  | NA(EN)    | FiLM(EN)  |
|----------------|-----------|-----------|-----------|-----------|
| Caltech101     | 80.9 ±0.7 | 81.1 ±0.7 | 88.2 ±0.8 | 89.0 ±0.6 |
| CIFAR100       | 40.4 ±0.5 | 42.2 ±0.9 | 42.7 ±1.6 | 51.8 ±1.3 |
| Flowers102     | 72.6 ±0.8 | 79.4 ±1.4 | 76.1 ±0.4 | 85.0 ±0.8 |
| Pets           | 76.9 ±1.2 | 74.5 ±1.4 | 82.4 ±1.6 | 81.8 ±1.7 |
| Sun397         | 35.1 ±0.9 | 29.1 ±0.7 | 41.9 ±1.0 | 40.9 ±0.7 |
| SVHN           | 20.9 ±1.3 | 28.8 ±2.7 | 16.5 ±1.1 | 31.7 ±3.7 |
| DTD            | 43.2 ±1.7 | 42.2 ±0.7 | 48.9 ±1.7 | 50.2 ±0.9 |
| EuroSAT        | 75.1 ±1.9 | 79.3 ±1.2 | 76.3 ±1.8 | 78.1 ±1.2 |
| Resics45       | 56.8 ±1.3 | 57.0 ±1.2 | 58.8 ±1.4 | 64.7 ±1.2 |
| Patch Camelyon | 62.4 ±5.5 | 64.6 ±7.2 | 59.8 ±7.2 | 64.9 ±6.6 |
| Retinopathy    | 23.0 ±2.5 | 23.6 ±1.7 | 25.6 ±1.6 | 26.0 ±2.0 |
| CLEVR-count    | 21.6 ±1.7 | 23.0 ±1.3 | 23.1 ±1.1 | 23.4 ±1.4 |
| CLEVR-dist     | 22.9 ±1.4 | 24.4 ±1.3 | 24.5 ±2.3 | 23.1 ±1.1 |
| dSprites-loc   | 13.0 ±1.0 | 15.9 ±1.0 | 8.5 ±0.6  | 19.8 ±2.0 |
| dSprites-ori   | 14.4 ±0.6 | 22.9 ±0.8 | 16.2 ±0.8 | 26.5 ±0.8 |
| SmallNORB-azi  | 9.4 ±0.8  | 9.8 ±1.1  | 9.3 ±0.8  | 10.1 ±0.6 |
| SmallNORB-elev | 15.8 ±0.7 | 15.9 ±0.7 | 15.1 ±0.6 | 15.4 ±0.7 |
| DMLab          | 21.6 ±1.5 | 22.1 ±1.8 | 22.1 ±1.3 | 23.3 ±1.9 |
| KITTI-dist     | 54.3 ±2.8 | 54.0 ±2.5 | 51.4 ±2.7 | 52.7 ±3.5 |
| FGVC-Aircraft  | 19.1 ±0.9 | 20.3 ±0.7 | 22.1 ±1.0 | 32.6 ±0.9 |
| Cars           | 14.8 ±0.5 | 13.9 ±0.3 | 22.6 ±0.6 | 28.1 ±0.4 |
| Letters        | 32.4 ±1.9 | 45.5 ±2.4 | 36.1 ±2.1 | 55.9 ±2.5 |
| Average acc    | 37.6      | 39.5      | 39.5      | 44.3      |

Table 18. Accuracy comparison between NA and FiLM methods in offline mode using either a pre-trained ResNet-18 (RN) or a pre-trained EfficientNet-B0 (EN) backbone. We use an LDA head. The reported results are based on **5** shots. Results are averaged over 5 runs (mean±std).

| Dataset        | NA(RN)    | FiLM(RN)  | NA(EN)    | FiLM(EN)   |
|----------------|-----------|-----------|-----------|------------|
| Caltech101     | 85.0 ±0.6 | 86.6 ±0.6 | 90.0 ±0.8 | 91.5 ±0.4  |
| CIFAR100       | 48.5 ±0.4 | 52.2 ±0.8 | 50.1 ±1.5 | 62.8 ±1.1  |
| Flowers102     | 81.2 ±0.7 | 87.1 ±0.2 | 83.9 ±0.3 | 91.1 ±0.3  |
| Pets           | 82.3 ±0.7 | 80.5 ±1.1 | 86.4 ±0.7 | 86.3 ±0.8  |
| Sun397         | 42.8 ±0.9 | 36.3 ±1.0 | 49.0 ±1.3 | 49.3 ±0.6  |
| SVHN           | 24.6 ±1.7 | 35.8 ±4.1 | 19.4 ±2.9 | 45.3 ±3.0  |
| DTD            | 51.9 ±0.9 | 50.5 ±0.6 | 55.6 ±0.6 | 59.1 ±0.8  |
| EuroSAT        | 82.0 ±0.7 | 85.4 ±0.9 | 82.1 ±0.9 | 84.4 ±1.6  |
| Resics45       | 64.8 ±1.5 | 67.2 ±2.0 | 65.5 ±1.1 | 73.0 ±1.3  |
| Patch Camelyon | 66.9 ±3.7 | 68.8 ±3.7 | 66.5 ±3.7 | 68.5 ±6.1  |
| Retinopathy    | 25.5 ±1.3 | 25.8 ±3.7 | 27.1 ±2.2 | 26.9 ±1.1  |
| CLEVR-count    | 23.8 ±0.7 | 25.6 ±2.0 | 25.7 ±0.6 | 27.6 ±1.6  |
| CLEVR-dist     | 24.9 ±0.7 | 27.2 ±1.2 | 26.3 ±1.1 | 26.2 ±1.3  |
| dSprites-loc   | 14.7 ±0.4 | 25.4 ±1.5 | 8.7 ±0.3  | 26.1 ±10.6 |
| dSprites-ori   | 16.6 ±0.9 | 29.7 ±1.3 | 18.2 ±0.7 | 34.0 ±2.6  |
| SmallNORB-azi  | 10.4 ±0.9 | 12.2 ±1.1 | 9.5 ±1.1  | 11.7 ±1.2  |
| SmallNORB-elev | 16.9 ±0.8 | 17.2 ±1.1 | 16.5 ±1.1 | 16.3 ±0.4  |
| DMLab          | 24.6 ±1.8 | 25.6 ±1.4 | 25.7 ±1.2 | 26.6 ±1.5  |
| KITTI-dist     | 53.0 ±2.0 | 55.9 ±3.5 | 52.9 ±1.5 | 55.4 ±3.7  |
| FGVC-Aircraft  | 25.9 ±0.8 | 29.5 ±0.8 | 28.5 ±0.4 | 43.3 ±1.1  |
| Cars           | 21.5 ±0.5 | 24.0 ±0.2 | 30.4 ±0.5 | 43.1 ±1.0  |
| Letters        | 41.5 ±1.2 | 62.7 ±1.9 | 45.6 ±0.8 | 67.5 ±1.3  |
| Average acc    | 42.2      | 46.0      | 43.8      | 50.7       |

Table 19. Accuracy comparison between NA and FiLM methods in offline mode using either a pre-trained ResNet-18 (RN) or a pre-trained EfficientNet-B0 (EN) backbone. We use an LDA head. The reported results are based on **10** shots. Results are averaged over 5 runs (mean±std).

| Dataset        | NA(RN)         | FiLM(RN)       | NA(EN)         | FiLM(EN)       |
|----------------|----------------|----------------|----------------|----------------|
| Caltech101     | 88.0 $\pm$ 0.3 | 87.7 $\pm$ 0.7 | 91.9 $\pm$ 0.5 | 93.8 $\pm$ 0.5 |
| CIFAR100       | 58.2 $\pm$ 0.9 | 61.8 $\pm$ 0.7 | 57.4 $\pm$ 1.0 | 73.8 $\pm$ 0.9 |
| Flowers102     | 81.2 $\pm$ 0.7 | 87.1 $\pm$ 0.2 | 83.9 $\pm$ 0.3 | 91.1 $\pm$ 0.3 |
| Pets           | 86.9 $\pm$ 0.4 | 86.8 $\pm$ 0.6 | 89.5 $\pm$ 0.4 | 89.9 $\pm$ 0.7 |
| Sun397         | 51.4 $\pm$ 1.3 | 47.8 $\pm$ 0.9 | 55.9 $\pm$ 1.0 | 59.7 $\pm$ 0.6 |
| SVHN           | 37.3 $\pm$ 0.8 | 74.5 $\pm$ 0.9 | 28.3 $\pm$ 1.1 | 77.2 $\pm$ 0.8 |
| DTD            | 59.9 $\pm$ 0.0 | 59.3 $\pm$ 0.6 | 61.1 $\pm$ 0.0 | 68.4 $\pm$ 0.2 |
| EuroSAT        | 88.3 $\pm$ 0.5 | 92.6 $\pm$ 0.5 | 87.7 $\pm$ 0.9 | 93.0 $\pm$ 0.6 |
| Resics45       | 73.7 $\pm$ 1.1 | 77.5 $\pm$ 1.1 | 73.5 $\pm$ 0.9 | 83.4 $\pm$ 0.6 |
| Patch Camelyon | 76.3 $\pm$ 0.9 | 77.4 $\pm$ 1.1 | 76.2 $\pm$ 1.1 | 77.9 $\pm$ 2.4 |
| Retinopathy    | 29.2 $\pm$ 2.1 | 30.4 $\pm$ 1.0 | 32.9 $\pm$ 2.2 | 35.2 $\pm$ 1.2 |
| CLEVR-count    | 29.5 $\pm$ 1.3 | 39.9 $\pm$ 1.4 | 30.1 $\pm$ 1.0 | 46.6 $\pm$ 1.1 |
| CLEVR-dist     | 31.7 $\pm$ 0.8 | 45.3 $\pm$ 2.6 | 32.2 $\pm$ 1.1 | 38.8 $\pm$ 1.0 |
| dSprites-loc   | 21.8 $\pm$ 0.6 | 70.2 $\pm$ 2.0 | 11.9 $\pm$ 0.4 | 83.7 $\pm$ 5.6 |
| dSprites-ori   | 20.8 $\pm$ 0.4 | 52.1 $\pm$ 1.5 | 20.1 $\pm$ 1.1 | 52.1 $\pm$ 1.3 |
| SmallNORB-azi  | 13.9 $\pm$ 0.5 | 16.4 $\pm$ 0.7 | 12.3 $\pm$ 0.8 | 16.8 $\pm$ 0.8 |
| SmallNORB-elev | 21.4 $\pm$ 1.0 | 25.1 $\pm$ 0.6 | 19.1 $\pm$ 0.7 | 22.9 $\pm$ 0.5 |
| DMLab          | 29.7 $\pm$ 0.5 | 31.6 $\pm$ 0.9 | 30.6 $\pm$ 0.3 | 34.6 $\pm$ 0.6 |
| KITTI-dist     | 62.0 $\pm$ 3.5 | 66.0 $\pm$ 2.7 | 61.4 $\pm$ 2.3 | 66.8 $\pm$ 3.0 |
| FGVC-Aircraft  | 38.9 $\pm$ 0.5 | 53.1 $\pm$ 0.3 | 41.0 $\pm$ 0.7 | 65.1 $\pm$ 0.7 |
| Cars           | 34.4 $\pm$ 0.0 | 49.5 $\pm$ 0.2 | 43.3 $\pm$ 0.0 | 67.9 $\pm$ 0.2 |
| Letters        | 56.1 $\pm$ 1.2 | 77.7 $\pm$ 1.3 | 57.6 $\pm$ 0.8 | 79.7 $\pm$ 0.4 |
| Average acc    | 49.6           | 59.5           | 49.9           | 64.5           |

Table 20. Accuracy comparison between NA and FiLM methods in offline mode using either a pre-trained ResNet-18 (RN) or a pre-trained EfficientNet-B0 (EN) backbone. We use an LDA head. The reported results are based on 50 shots. Results are averaged over 5 runs (mean $\pm$ std).

| Dataset        | NA                    | Meta-Learn            | FiLM                  | Full-body             |
|----------------|-----------------------|-----------------------|-----------------------|-----------------------|
| Caltech101     | 88.2 $\pm$ 0.8        | 86.7 $\pm$ 0.9        | 89.0 $\pm$ 0.6        | <b>89.4</b> $\pm$ 0.7 |
| CIFAR100       | 42.7 $\pm$ 1.6        | 42.1 $\pm$ 1.3        | <b>51.8</b> $\pm$ 1.3 | 49.3 $\pm$ 1.1        |
| Flowers102     | 76.1 $\pm$ 0.4        | 78.2 $\pm$ 0.4        | <b>85.0</b> $\pm$ 0.8 | 81.7 $\pm$ 0.6        |
| Pets           | 82.4 $\pm$ 1.6        | <b>83.8</b> $\pm$ 1.0 | 81.8 $\pm$ 1.7        | 80.8 $\pm$ 1.7        |
| Sun397         | <b>41.9</b> $\pm$ 1.0 | 40.2 $\pm$ 0.6        | 40.9 $\pm$ 0.7        | 35.2 $\pm$ 0.5        |
| SVHN           | 16.5 $\pm$ 1.1        | 27.4 $\pm$ 3.6        | <b>31.7</b> $\pm$ 3.7 | 19.6 $\pm$ 1.2        |
| DTD            | 48.9 $\pm$ 1.7        | <b>50.5</b> $\pm$ 1.7 | 50.2 $\pm$ 0.9        | 49.0 $\pm$ 1.3        |
| EuroSAT        | 76.3 $\pm$ 1.8        | 75.2 $\pm$ 1.5        | <b>78.1</b> $\pm$ 1.2 | 76.7 $\pm$ 2.9        |
| Resics45       | 58.8 $\pm$ 1.4        | 62.7 $\pm$ 1.0        | <b>64.7</b> $\pm$ 1.2 | 62.3 $\pm$ 2.5        |
| Patch Camelyon | 59.8 $\pm$ 7.2        | 64.2 $\pm$ 7.3        | <b>64.9</b> $\pm$ 6.6 | 59.4 $\pm$ 4.9        |
| Retinopathy    | 25.6 $\pm$ 1.6        | <b>26.8</b> $\pm$ 3.5 | 26.0 $\pm$ 2.0        | 24.5 $\pm$ 2.5        |
| CLEVR-count    | 23.1 $\pm$ 1.1        | 22.6 $\pm$ 0.8        | 23.4 $\pm$ 1.4        | <b>23.5</b> $\pm$ 3.0 |
| CLEVR-dist     | 24.5 $\pm$ 2.3        | 23.8 $\pm$ 1.1        | 23.1 $\pm$ 1.1        | <b>25.6</b> $\pm$ 3.5 |
| dSprites-loc   | 8.5 $\pm$ 0.6         | 8.9 $\pm$ 0.5         | 19.8 $\pm$ 2.0        | <b>27.1</b> $\pm$ 1.6 |
| dSprites-ori   | 16.2 $\pm$ 0.8        | 19.2 $\pm$ 0.7        | <b>26.5</b> $\pm$ 0.8 | 19.9 $\pm$ 1.5        |
| SmallNORB-azi  | 9.3 $\pm$ 0.8         | 8.7 $\pm$ 1.0         | 10.1 $\pm$ 0.6        | <b>10.4</b> $\pm$ 0.8 |
| SmallNORB-elev | 15.1 $\pm$ 0.6        | 15.4 $\pm$ 0.5        | 15.4 $\pm$ 0.7        | <b>16.2</b> $\pm$ 1.1 |
| DMLab          | 22.1 $\pm$ 1.3        | <b>24.9</b> $\pm$ 1.5 | 23.3 $\pm$ 1.9        | 22.1 $\pm$ 1.3        |
| KITTI-dist     | 51.4 $\pm$ 2.7        | <b>55.0</b> $\pm$ 1.5 | 52.7 $\pm$ 3.5        | 52.8 $\pm$ 2.5        |
| FGVC-Aircraft  | 22.1 $\pm$ 1.0        | 31.9 $\pm$ 0.6        | <b>32.6</b> $\pm$ 0.9 | 23.6 $\pm$ 0.8        |
| Cars           | 22.6 $\pm$ 0.6        | 22.8 $\pm$ 0.4        | <b>28.1</b> $\pm$ 0.4 | 23.5 $\pm$ 0.3        |
| Letters        | 36.1 $\pm$ 2.1        | 46.5 $\pm$ 3.2        | <b>55.9</b> $\pm$ 2.5 | 35.7 $\pm$ 3.3        |
| Average acc    | 39.5                  | 41.7                  | <b>44.3</b>           | 41.3                  |

Table 21. Accuracy comparison between different adaptation methods in offline mode using a pre-trained EfficientNet-B0 backbone. We use an LDA head. The reported results are based on 5 shots and averaged over 5 runs (mean $\pm$ std).

| Dataset        | NA                    | Meta-Learn            | FiLM                  | Full-body             |
|----------------|-----------------------|-----------------------|-----------------------|-----------------------|
| Caltech101     | 90.0 $\pm$ 0.8        | 89.1 $\pm$ 0.3        | 91.5 $\pm$ 0.4        | <b>91.7</b> $\pm$ 0.7 |
| CIFAR100       | 50.1 $\pm$ 1.5        | 50.1 $\pm$ 1.2        | <b>62.8</b> $\pm$ 1.1 | 59.5 $\pm$ 0.3        |
| Flowers102     | 83.9 $\pm$ 0.3        | 84.4 $\pm$ 0.3        | <b>91.1</b> $\pm$ 0.3 | 90.0 $\pm$ 0.5        |
| Pets           | 86.4 $\pm$ 0.7        | <b>86.8</b> $\pm$ 0.2 | 86.3 $\pm$ 0.8        | 85.7 $\pm$ 0.5        |
| Sun397         | 49.0 $\pm$ 1.3        | 46.3 $\pm$ 0.9        | <b>49.3</b> $\pm$ 0.6 | 45.0 $\pm$ 0.4        |
| SVHN           | 19.4 $\pm$ 2.9        | 33.0 $\pm$ 2.2        | <b>45.3</b> $\pm$ 3.0 | 27.1 $\pm$ 3.8        |
| DTD            | 55.6 $\pm$ 0.6        | 57.7 $\pm$ 1.4        | <b>59.1</b> $\pm$ 0.8 | 56.7 $\pm$ 1.0        |
| EuroSAT        | 82.1 $\pm$ 0.9        | 81.2 $\pm$ 0.7        | 84.4 $\pm$ 1.6        | <b>84.9</b> $\pm$ 1.5 |
| Resics45       | 65.5 $\pm$ 1.1        | 68.4 $\pm$ 1.2        | <b>73.0</b> $\pm$ 1.3 | 72.8 $\pm$ 1.3        |
| Patch Camelyon | 66.5 $\pm$ 3.7        | 67.5 $\pm$ 5.5        | <b>68.5</b> $\pm$ 6.1 | 61.2 $\pm$ 4.5        |
| Retinopathy    | <b>27.1</b> $\pm$ 2.2 | 26.9 $\pm$ 0.4        | 26.9 $\pm$ 1.1        | 24.6 $\pm$ 3.3        |
| CLEVR-count    | 25.7 $\pm$ 0.6        | 24.3 $\pm$ 1.1        | 27.6 $\pm$ 1.6        | <b>27.7</b> $\pm$ 2.0 |
| CLEVR-dist     | 26.3 $\pm$ 1.1        | 25.5 $\pm$ 0.8        | 26.2 $\pm$ 1.3        | <b>30.0</b> $\pm$ 4.2 |
| dSprites-loc   | 8.7 $\pm$ 0.3         | 8.9 $\pm$ 0.4         | 26.1 $\pm$ 10.6       | <b>44.8</b> $\pm$ 1.3 |
| dSprites-ori   | 18.2 $\pm$ 0.7        | 20.4 $\pm$ 1.2        | <b>34.0</b> $\pm$ 2.6 | 29.6 $\pm$ 6.8        |
| SmallNORB-azi  | 9.5 $\pm$ 1.1         | 10.5 $\pm$ 0.2        | <b>11.7</b> $\pm$ 1.2 | 11.5 $\pm$ 0.8        |
| SmallNORB-elev | 16.5 $\pm$ 1.1        | 15.8 $\pm$ 0.6        | 16.3 $\pm$ 0.4        | <b>18.3</b> $\pm$ 1.5 |
| DMLab          | 25.7 $\pm$ 1.2        | <b>27.8</b> $\pm$ 1.7 | 26.6 $\pm$ 1.5        | 25.6 $\pm$ 1.3        |
| KITTI-dist     | 52.9 $\pm$ 1.5        | <b>56.4</b> $\pm$ 1.8 | 55.4 $\pm$ 3.7        | 54.9 $\pm$ 1.3        |
| FGVC-Aircraft  | 28.5 $\pm$ 0.4        | 39.0 $\pm$ 0.8        | <b>43.3</b> $\pm$ 1.1 | 36.7 $\pm$ 0.6        |
| Cars           | 30.4 $\pm$ 0.5        | 29.8 $\pm$ 0.1        | 43.1 $\pm$ 1.0        | <b>43.5</b> $\pm$ 0.6 |
| Letters        | 45.6 $\pm$ 0.8        | 54.5 $\pm$ 1.5        | <b>67.5</b> $\pm$ 1.3 | 55.2 $\pm$ 1.3        |
| Average acc    | 43.8                  | 45.7                  | <b>50.7</b>           | 49.0                  |

Table 22. Accuracy comparison between different adaptation methods in offline mode using a pre-trained EfficientNet-B0 backbone. We use an LDA head. The reported results are based on **10** shots and averaged over 5 runs (mean $\pm$ std).

| Dataset        | NA             | Meta-Learn            | FiLM                  | Full-body             |
|----------------|----------------|-----------------------|-----------------------|-----------------------|
| Caltech101     | 91.9 $\pm$ 0.5 | 91.0 $\pm$ 0.4        | 93.8 $\pm$ 0.5        | <b>93.9</b> $\pm$ 0.3 |
| CIFAR100       | 57.4 $\pm$ 1.0 | 58.0 $\pm$ 0.9        | <b>73.8</b> $\pm$ 0.9 | 73.1 $\pm$ 0.7        |
| Flowers102     | 83.9 $\pm$ 0.3 | 84.4 $\pm$ 0.3        | <b>91.1</b> $\pm$ 0.3 | 90.0 $\pm$ 0.5        |
| Pets           | 89.5 $\pm$ 0.4 | 89.6 $\pm$ 0.3        | <b>89.9</b> $\pm$ 0.7 | 89.6 $\pm$ 0.6        |
| Sun397         | 55.9 $\pm$ 1.0 | 53.7 $\pm$ 0.8        | 59.7 $\pm$ 0.6        | <b>60.4</b> $\pm$ 0.6 |
| SVHN           | 28.3 $\pm$ 1.1 | 47.3 $\pm$ 1.4        | <b>77.2</b> $\pm$ 0.8 | 64.5 $\pm$ 1.3        |
| DTD            | 61.1 $\pm$ 0.0 | 63.8 $\pm$ 0.0        | <b>68.4</b> $\pm$ 0.2 | 64.4 $\pm$ 0.2        |
| EuroSAT        | 87.7 $\pm$ 0.9 | 85.7 $\pm$ 0.6        | 93.0 $\pm$ 0.6        | <b>94.1</b> $\pm$ 0.6 |
| Resics45       | 73.5 $\pm$ 0.9 | 75.5 $\pm$ 1.0        | 83.4 $\pm$ 0.6        | <b>87.6</b> $\pm$ 0.7 |
| Patch Camelyon | 76.2 $\pm$ 1.1 | <b>78.0</b> $\pm$ 1.4 | 77.9 $\pm$ 2.4        | 72.2 $\pm$ 1.8        |
| Retinopathy    | 32.9 $\pm$ 2.2 | 31.6 $\pm$ 1.2        | <b>35.2</b> $\pm$ 1.2 | 31.3 $\pm$ 2.9        |
| CLEVR-count    | 30.1 $\pm$ 1.0 | 28.7 $\pm$ 1.1        | <b>46.6</b> $\pm$ 1.1 | 45.2 $\pm$ 1.1        |
| CLEVR-dist     | 32.2 $\pm$ 1.1 | 30.5 $\pm$ 1.7        | 38.8 $\pm$ 1.0        | <b>44.7</b> $\pm$ 2.2 |
| dSprites-loc   | 11.9 $\pm$ 0.4 | 12.2 $\pm$ 0.5        | 83.7 $\pm$ 5.6        | <b>87.1</b> $\pm$ 2.4 |
| dSprites-ori   | 20.1 $\pm$ 1.1 | 24.7 $\pm$ 1.9        | <b>52.1</b> $\pm$ 1.3 | 44.8 $\pm$ 2.3        |
| SmallNORB-azi  | 12.3 $\pm$ 0.8 | 12.4 $\pm$ 0.5        | 16.8 $\pm$ 0.8        | <b>18.3</b> $\pm$ 0.7 |
| SmallNORB-elev | 19.1 $\pm$ 0.7 | 18.9 $\pm$ 1.0        | 22.9 $\pm$ 0.5        | <b>31.3</b> $\pm$ 1.7 |
| DMLab          | 30.6 $\pm$ 0.3 | 32.6 $\pm$ 0.8        | <b>34.6</b> $\pm$ 0.6 | 32.7 $\pm$ 1.6        |
| KITTI-dist     | 61.4 $\pm$ 2.3 | 62.6 $\pm$ 2.0        | 66.8 $\pm$ 3.0        | <b>66.9</b> $\pm$ 2.2 |
| FGVC-Aircraft  | 41.0 $\pm$ 0.7 | 50.9 $\pm$ 0.7        | 65.1 $\pm$ 0.7        | <b>73.5</b> $\pm$ 0.4 |
| Cars           | 43.3 $\pm$ 0.0 | 40.1 $\pm$ 0.0        | 67.9 $\pm$ 0.2        | <b>79.4</b> $\pm$ 0.1 |
| Letters        | 57.6 $\pm$ 0.8 | 64.2 $\pm$ 0.6        | 79.7 $\pm$ 0.4        | <b>82.3</b> $\pm$ 0.9 |
| Average acc    | 49.9           | 51.7                  | 64.5                  | <b>64.9</b>           |

Table 23. Accuracy comparison between different adaptation methods in offline mode using a pre-trained EfficientNet-B0 backbone. We use an LDA head. The reported results are based on **50** shots and averaged over 5 runs (mean $\pm$ std).

| Method           | Accuracy (%) in each session ( $\uparrow$ ) |             |             |             |             |             |             |             |             |             |
|------------------|---------------------------------------------|-------------|-------------|-------------|-------------|-------------|-------------|-------------|-------------|-------------|
|                  | 1                                           | 2           | 3           | 4           | 5           | 6           | 7           | 8           | 9           | 10          |
| NA               | 93.2                                        | 87.1        | 81.9        | 80.2        | 76.8        | 74.3        | 72.8        | 70.6        | 70.1        | 68.2        |
| <u>E-EWC+SDC</u> | <b>97.2</b>                                 | 70.5        | 63.6        | 46.4        | 40.2        | 40.7        | 38.8        | 35.5        | 33.9        | 32.4        |
| FACT             | 96.6                                        | 48.2        | 32.8        | 24.2        | 19.3        | 16.4        | 13.9        | 12.5        | 11.3        | 10.2        |
| ALICE            | 96.6                                        | 80.2        | 73.7        | 69.4        | 64.8        | 61.7        | 58.1        | 55.7        | 54.3        | 52.4        |
| FSA              | 96.0                                        | 86.3        | 80.5        | 77.7        | 74.2        | 70.9        | 68.2        | 65.8        | 64.2        | 62.8        |
| FSA-LL           | 96.4                                        | 84.9        | 79.1        | 75.4        | 71.6        | 68.5        | 66.4        | 64.1        | 62.7        | 60.5        |
| FSA-FiLM         | 96.4                                        | <b>90.4</b> | <b>86.8</b> | <b>84.7</b> | <b>82.0</b> | <b>79.8</b> | <b>78.2</b> | <b>76.1</b> | <b>75.7</b> | <b>73.8</b> |
| GDumb-1k         | 94.17                                       | 86.2        | 81.0        | 76.1        | 70.8        | 64.3        | 62.0        | 59.7        | 57.1        | 54.5        |
| GDumb-5k         | 97.0                                        | 91.6        | 88.1        | 85.1        | 81.8        | 77.9        | 75.6        | 73.2        | 71.8        | 69.3        |

Table 24. Detailed accuracy for each incremental session on **CIFAR100** under the **high-shot CIL** setting. The best results across all methods per session are in bold while the best results across the no-memory methods are underlined. A pre-trained EfficientNet-B0 on Imagenet-1k is used as a backbone for all methods.

| Method           | Accuracy (%) in each session ( $\uparrow$ ) |             |             |             |             |             |             |             |             |
|------------------|---------------------------------------------|-------------|-------------|-------------|-------------|-------------|-------------|-------------|-------------|
|                  | 1                                           | 2           | 3           | 4           | 5           | 6           | 7           | 8           | 9           |
| NA               | 96.3                                        | 94.5        | 91.6        | 89.9        | 87.7        | 84.8        | 82.0        | 82.8        | 82.6        |
| <u>E-EWC+SDC</u> | 98.7                                        | 89.7        | 72.6        | 65.4        | 43.0        | 40.8        | 35.1        | 26.6        | 21.7        |
| FACT             | 98.5                                        | 66.9        | 50.5        | 40.4        | 33.8        | 28.9        | 25.3        | 23.9        | 22.0        |
| ALICE            | 98.1                                        | 92.2        | 87.0        | 84.4        | 80.4        | 76.4        | 72.6        | 73.4        | 72.8        |
| FSA              | 98.0                                        | 93.6        | 89.8        | 88.8        | 86.8        | 84.4        | 81.7        | 82.3        | 82.8        |
| FSA-LL           | 97.8                                        | 92.1        | 87.3        | 85.6        | 83.6        | 81.4        | 78.5        | 78.6        | 79.0        |
| FSA-FiLM         | <b>98.5</b>                                 | <b>96.0</b> | <b>92.6</b> | <b>90.6</b> | <b>89.5</b> | <b>87.3</b> | <b>85.0</b> | <b>85.6</b> | <b>85.4</b> |
| GDumb-1k         | 96.9                                        | 94.3        | 91.9        | 90.6        | 88.2        | 85.4        | 80.7        | 82.3        | 82.4        |
| GDumb-5k         | 97.5                                        | 96.7        | 94.6        | 92.7        | 91.8        | 90.3        | 89.0        | 90.0        | 90.0        |

Table 25. Detailed accuracy for each incremental session on **CORE50** under the **high-shot CIL** setting. The best results across all methods per session are in bold while the best results across the no-memory methods are underlined. A pre-trained EfficientNet-B0 on Imagenet-1k is used as a backbone for all methods.

| Method           | Accuracy (%) in each session ( $\uparrow$ ) |             |             |             |             |
|------------------|---------------------------------------------|-------------|-------------|-------------|-------------|
|                  | 1                                           | 2           | 3           | 4           | 5           |
| NA               | 81.5                                        | 61.5        | 48.5        | 42.5        | 39.9        |
| <u>E-EWC+SDC</u> | 99.0                                        | 55.5        | 48.1        | 44.7        | 39.5        |
| FACT             | <b>99.3</b>                                 | 63.5        | 47.4        | 38.7        | 33.8        |
| ALICE            | 99.3                                        | 73.5        | 56.4        | 49.9        | 46.1        |
| FSA              | 97.2                                        | 86.4        | 78.2        | 73.0        | 71.3        |
| FSA-LL           | 96.7                                        | 82.7        | 72.6        | 67.4        | 64.6        |
| FSA-FiLM         | 99.1                                        | <b>89.0</b> | <b>81.7</b> | <b>77.6</b> | <b>75.9</b> |
| GDumb-1k         | 97.4                                        | 91.7        | 87.3        | 83.8        | 78.3        |
| GDumb-5k         | 98.6                                        | 97.3        | 95.8        | 93.7        | 93.2        |

Table 26. Detailed accuracy for each incremental session on **SVHN** under the **high-shot CIL** setting. The best results across all methods per session are in bold while the best results across the no-memory methods are underlined. A pre-trained EfficientNet-B0 on Imagenet-1k is used as a backbone for all methods.

| Method           | Accuracy (%) in each session ( $\uparrow$ ) |             |             |             |             |             |             |
|------------------|---------------------------------------------|-------------|-------------|-------------|-------------|-------------|-------------|
|                  | 1                                           | 2           | 3           | 4           | 5           | 6           | 7           |
| NA               | 44.9                                        | 37.4        | 31.6        | 27.1        | 23.8        | 21.5        | 20.6        |
| <u>E-EWC+SDC</u> | <u>99.5</u>                                 | <u>58.1</u> | <u>29.9</u> | <u>33.0</u> | <u>19.4</u> | <u>21.7</u> | <u>18.6</u> |
| FACT             | <b>100.0</b>                                | 16.6        | 12.7        | 10.1        | 8.4         | 7.2         | 6.4         |
| ALICE            | <b>100.0</b>                                | 92.6        | 77.6        | 69.6        | 65.6        | 69.8        | 68.3        |
| FSA              | <b>100.0</b>                                | <b>95.4</b> | <b>92.3</b> | <b>87.7</b> | <b>89.9</b> | <b>90.7</b> | <b>91.5</b> |
| FSA-LL           | 99.8                                        | 94.0        | 93.9        | 90.5        | 91.5        | 91.4        | 91.3        |
| FSA-FiLM         | 99.6                                        | 89.6        | 84.6        | 78.7        | 77.5        | 77.0        | 76.9        |
| GDumb-1k         | 91.2                                        | 85.5        | 85.6        | 83.8        | 76.3        | 78.1        | 79.5        |
| GDumb-5k         | 99.4                                        | 99.5        | 99.6        | 98.5        | 99.4        | 98.4        | 99.4        |

Table 27. Detailed accuracy for each incremental session on **dSprites-loc** under the **high-shot CIL** setting. The best results across all methods per session are in bold while the best results across the no-memory methods are underlined. A pre-trained EfficientNet-B0 on Imagenet-1k is used as a backbone for all methods.

| Method           | Accuracy (%) in each session ( $\uparrow$ ) |             |             |             |             |             |             |             |             |             |
|------------------|---------------------------------------------|-------------|-------------|-------------|-------------|-------------|-------------|-------------|-------------|-------------|
|                  | 1                                           | 2           | 3           | 4           | 5           | 6           | 7           | 8           | 9           | 10          |
| NA               | 42.0                                        | 38.0        | 29.9        | 37.0        | 43.9        | 41.3        | 40.7        | 42.4        | 41.2        | 41.2        |
| <u>E-EWC-SDC</u> | <u>58.0</u>                                 | <u>35.3</u> | <u>27.3</u> | <u>27.7</u> | <u>27.4</u> | <u>28.2</u> | <u>23.5</u> | <u>25.4</u> | <u>25.7</u> | <u>25.6</u> |
| FACT             | 58.7                                        | 30.6        | 24.9        | 21.4        | 19.1        | 19.0        | 17.6        | 16.9        | 15.5        | 14.7        |
| ALICE            | <b>61.3</b>                                 | 43.5        | 36.7        | 39.5        | 41.5        | 41.8        | 41.0        | 41.6        | 40.0        | 39.8        |
| FSA              | 54.2                                        | 44.4        | 39.7        | 45.9        | 52.2        | 49.6        | 48.9        | 51.4        | 51.1        | 50.8        |
| FSA-LL           | 58.0                                        | 40.5        | 37.0        | 41.6        | 44.3        | 44.9        | 44.9        | 46.1        | 45.1        | 45.4        |
| FSA-FiLM         | 52.9                                        | <b>46.2</b> | <b>44.7</b> | <b>50.3</b> | <b>53.3</b> | <b>55.0</b> | <b>54.5</b> | <b>56.3</b> | <b>55.5</b> | <b>55.9</b> |
| GDumb-1k         | 59.8                                        | 47.3        | 42.6        | 46.5        | 51.8        | 43.7        | 43.4        | 43.0        | 39.2        | 38.4        |
| GDumb-5k         | 58.6                                        | 43.0        | 36.9        | 40.1        | 41.0        | 36.1        | 30.3        | 30.3        | 29.5        | 25.3        |

Table 28. Detailed accuracy for each incremental session on **FGVC-Aircraft** under the **high-shot CIL** setting. The best results across all methods per session are in bold while the best results across the no-memory methods are underlined. A pre-trained EfficientNet-B0 on Imagenet-1k is used as a backbone for all methods.

| Method           | Accuracy (%) in each session ( $\uparrow$ ) |             |             |             |             |             |             |             |             |             |
|------------------|---------------------------------------------|-------------|-------------|-------------|-------------|-------------|-------------|-------------|-------------|-------------|
|                  | 1                                           | 2           | 3           | 4           | 5           | 6           | 7           | 8           | 9           | 10          |
| NA               | 72.7                                        | 49.9        | 49.9        | 46.4        | 47.1        | 47.2        | 44.5        | 44.7        | 44.6        | 43.3        |
| <u>E-EWC+SDC</u> | <u>80.2</u>                                 | <u>47.3</u> | <u>38.7</u> | <u>37.2</u> | <u>34.8</u> | <u>33.5</u> | <u>31.0</u> | <u>31.6</u> | <u>31.2</u> | <u>30.0</u> |
| FACT             | 79.8                                        | 2.9         | 1.9         | 1.4         | 1.1         | 0.9         | 0.8         | 0.7         | 0.6         | 0.6         |
| ALICE            | 82.7                                        | 52.9        | 49.6        | 45.1        | 42.8        | 41.1        | 39.0        | 38.8        | 38.1        | 36.4        |
| FSA              | 79.3                                        | 55.0        | 55.9        | 54.0        | 53.3        | 52.7        | 51.5        | 51.5        | 51.4        | 50.3        |
| FSA-LL           | <b>81.2</b>                                 | 49.3        | 50.5        | 49.9        | 49.0        | 46.9        | 46.8        | 46.9        | 46.6        | 45.7        |
| FSA-FiLM         | 80.1                                        | <b>59.5</b> | <b>60.0</b> | <b>59.4</b> | <b>58.9</b> | <b>58.2</b> | <b>56.8</b> | <b>57.3</b> | <b>56.7</b> | <b>55.9</b> |
| GDumb-1k         | 81.5                                        | 59.9        | 54.0        | 47.3        | 40.5        | 33.9        | 32.7        | 27.6        | 22.8        | 18.1        |
| GDumb-5k         | 82.1                                        | 65.8        | 59.0        | 51.8        | 46.7        | 38.0        | 37.6        | 32.3        | 28.7        | 24.2        |

Table 29. Detailed accuracy for each incremental session on **Cars** under the **high-shot CIL** setting. The best results across all methods per session are in bold while the best results across the no-memory methods are underlined. A pre-trained EfficientNet-B0 on Imagenet-1k is used as a backbone for all methods.

| Method    | Accuracy (%) in each session ( $\uparrow$ ) |             |             |             |             |             |             |             |             |             |             |
|-----------|---------------------------------------------|-------------|-------------|-------------|-------------|-------------|-------------|-------------|-------------|-------------|-------------|
|           | <b>1</b>                                    | <b>2</b>    | <b>3</b>    | <b>4</b>    | <b>5</b>    | <b>6</b>    | <b>7</b>    | <b>8</b>    | <b>9</b>    | <b>10</b>   | <b>11</b>   |
| NA        | 90.12                                       | 84.3        | 82.4        | 80.1        | 78.7        | 78.0        | 76.0        | 75.3        | 72.8        | 71.6        | 68.4        |
| E-EWC+SDC | 99.9                                        | 83.4        | 64.5        | 59.9        | 47.8        | 54.1        | 42.6        | 40.4        | 31.1        | 30.0        | 33.6        |
| FACT      | 99.9                                        | 69.9        | 53.9        | 43.4        | 36.3        | 32.7        | 29.3        | 27.0        | 24.4        | 22.4        | 20.9        |
| ALICE     | <b>99.9</b>                                 | 96.1        | 93.4        | 89.5        | 88.7        | 87.9        | 85.8        | 83.7        | 81.1        | 79.3        | 75.7        |
| FSA       | 99.8                                        | 96.4        | 94.6        | 91.3        | 90.3        | 89.6        | 87.9        | 86.3        | 83.4        | 82.0        | 78.4        |
| FSA-LL    | 99.8                                        | 95.9        | 94.0        | 90.4        | 89.0        | 88.3        | 86.3        | 85.3        | 82.4        | 81.0        | 77.2        |
| FSA-FiLM  | 99.6                                        | <b>96.0</b> | <b>94.4</b> | <b>92.0</b> | <b>91.1</b> | <b>90.6</b> | <b>88.5</b> | <b>87.7</b> | <b>85.0</b> | <b>83.4</b> | <b>79.7</b> |
| GDumb-1k  | 96.0                                        | 92.2        | 89.4        | 86.7        | 85.7        | 83.9        | 81.1        | 80.3        | 76.2        | 75.2        | 70.1        |
| GDumb-5k  | 99.4                                        | 98.3        | 97.2        | 95.2        | 94.6        | 94.3        | 92.2        | 91.3        | 88.5        | 86.9        | 82.6        |

Table 30. Detailed accuracy for each incremental session on **Letters** under the **high-shot CIL** setting. The best results across all methods per session are in bold while the best results across the no-memory methods are underlined. A pre-trained EfficientNet-B0 on Imagenet-1k is used as a backbone for all methods.

| Method             | Backbone | Accuracy (%) in each session ( $\uparrow$ ) |             |             |             |             |             |             |             |             |
|--------------------|----------|---------------------------------------------|-------------|-------------|-------------|-------------|-------------|-------------|-------------|-------------|
|                    |          | <b>1</b>                                    | <b>2</b>    | <b>3</b>    | <b>4</b>    | <b>5</b>    | <b>6</b>    | <b>7</b>    | <b>8</b>    | <b>9</b>    |
| Decoupled-Cos*     | RN-20    | 74.6                                        | 67.4        | 63.6        | 59.6        | 56.1        | 53.8        | 51.7        | 49.7        | 47.7        |
| CEC*               |          | 73.1                                        | 68.9        | 65.3        | 61.2        | 58.1        | 55.6        | 53.2        | 51.3        | 49.1        |
| FACT*              |          | 74.6                                        | 72.1        | 67.6        | 63.5        | 61.4        | 58.4        | 56.3        | 54.2        | 52.1        |
| FSA                |          | 75.1                                        | 71.2        | 67.5        | 63.3        | 60.0        | 57.6        | 55.5        | 54.2        | 52.0        |
| NA                 | RN-18    | 68.9                                        | 65.4        | 62.4        | 58.7        | 57.2        | 54.7        | 53.3        | 51.9        | 50.4        |
| FACT               |          | 75.8                                        | 71.0        | 66.3        | 62.5        | 59.1        | 56.3        | 54.1        | 51.8        | 49.5        |
| ALICE <sup>†</sup> |          | 79.0                                        | 70.5        | 67.1        | 63.4        | 61.2        | 59.2        | 58.1        | 56.3        | 54.1        |
| FSA-FiLM           |          | 73.0                                        | 69.7        | 66.3        | 63.2        | 61.9        | 59.3        | 58.3        | 57.2        | 55.2        |
| FSA                | EN-B0    | 82.0                                        | 78.2        | 74.8        | 70.22       | 68.7        | 66.2        | 65.3        | 63.8        | 61.4        |
| NA                 |          | 74.4                                        | 70.4        | 67.4        | 63.4        | 62.4        | 59.8        | 58.4        | 56.9        | 55.2        |
| FACT               |          | 86.4                                        | 80.6        | 75.6        | 71.1        | 67.6        | 64.4        | 61.8        | 59.2        | 56.5        |
| ALICE              |          | 87.7                                        | 83.3        | 78.7        | 74.4        | 72.1        | 69.6        | 67.4        | 65.4        | 62.7        |
| FSA-FiLM           | EN-B0    | 79.6                                        | 75.6        | 72.9        | 68.8        | 68.2        | 65.4        | 64.9        | 63.9        | 61.8        |
| FSA                |          | <b>87.6</b>                                 | <b>83.5</b> | <b>79.7</b> | <b>75.4</b> | <b>73.8</b> | <b>70.9</b> | <b>70.2</b> | <b>68.8</b> | <b>66.1</b> |

Table 31. Detailed accuracy for each incremental session on **CIFAR100** under the **few-shot + CIL** setting. Asterisk (\*) indicates that the reported results of a method are from [31] and <sup>†</sup> that the reported results of a method are from [22]. We use three different backbones, EfficientNet-B0 (EN-B0) and ResNet-18/20 (RN-18/20); EN-B0 and RN-18 are pre-trained on Imagenet-1k.



| Method          | Backbone | Accuracy (%) in each session ( $\uparrow$ ) |             |             |             |             |             |             |             |             |             |             |
|-----------------|----------|---------------------------------------------|-------------|-------------|-------------|-------------|-------------|-------------|-------------|-------------|-------------|-------------|
|                 |          | 1                                           | 2           | 3           | 4           | 5           | 6           | 7           | 8           | 9           | 10          | 11          |
| NA              |          | 70.7                                        | 66.7        | 63.4        | 59.0        | 58.2        | 56.4        | 54.0        | 52.3        | 50.5        | 50.5        | 50.0        |
| Decoupled-Cos*  |          | 75.5                                        | 71.0        | 66.5        | 61.2        | 60.9        | 56.9        | 55.4        | 53.5        | 51.9        | 50.9        | 49.3        |
| CEC*            |          | 75.9                                        | 71.9        | 68.5        | 63.5        | 62.4        | 58.3        | 57.7        | 55.8        | 54.8        | 53.5        | 52.3        |
| FACT*           | RN-18    | 75.9                                        | 73.2        | 70.8        | 66.1        | 65.6        | 62.2        | 61.7        | 59.8        | 58.4        | 57.9        | 56.9        |
| ALICE $\dagger$ |          | 77.4                                        | 72.7        | 70.6        | 67.2        | 65.9        | 63.4        | 62.9        | 61.9        | 60.5        | 60.6        | 60.1        |
| FSA-FiLM        |          | 72.7                                        | 68.2        | 64.9        | 60.8        | 60.2        | 58.1        | 55.4        | 54.8        | 53.5        | 53.4        | 52.7        |
| FSA             |          | 76.1                                        | 72.6        | 69.6        | 65.0        | 64.6        | 62.3        | 61.6        | 59.6        | 58.2        | 58.2        | 57.6        |
| NA              |          | 78.6                                        | 75.8        | 73.4        | 69.5        | 69.2        | 67.3        | 66.5        | 64.3        | 62.7        | 63.1        | 63.2        |
| FACT            |          | <b>82.0</b>                                 | <b>77.5</b> | 74.4        | 70.0        | 69.3        | 66.6        | 66.2        | 64.7        | <b>64.0</b> | 63.3        | 62.9        |
| ALICE           | EN-B0    | 81.6                                        | 77.1        | <b>75.1</b> | <b>71.9</b> | <b>70.5</b> | <b>67.8</b> | <b>66.8</b> | <b>65.7</b> | <b>64.1</b> | <b>64.0</b> | <b>63.5</b> |
| FSA-FiLM        |          | 79.0                                        | 75.3        | 72.7        | 69.5        | 68.3        | 66.5        | 65.3        | 64.1        | 62.8        | 62.9        | 62.9        |
| FSA             |          | 80.2                                        | 77.1        | 74.2        | 69.3        | 69.3        | 66.9        | 66.4        | 64.8        | 63.6        | 63.8        | 63.4        |

Table 32. Detailed accuracy for each incremental session on **CUB200** under the **few-shot+ CIL** setting. Asterisk (\*) indicates that the reported results of a method are from [31] and  $\dagger$  that the reported results of a method are from [22]. We use two different backbones, EfficientNet-B0 (EN-B0) and ResNet-18 (RN-18); EN-B0 and RN-18 are pre-trained on Imagenet-1k.

| Method   | Accuracy (%) in each session ( $\uparrow$ ) |                                  |                                  |                                  |                                  |                                  |                                  |                                  |                                  |  |
|----------|---------------------------------------------|----------------------------------|----------------------------------|----------------------------------|----------------------------------|----------------------------------|----------------------------------|----------------------------------|----------------------------------|--|
|          | 1                                           | 2                                | 3                                | 4                                | 5                                | 6                                | 7                                | 8                                | 9                                |  |
| NA       | 80.2 $\pm$ 0.9                              | 76.2 $\pm$ 0.7                   | 72.4 $\pm$ 1.5                   | 68.7 $\pm$ 1.5                   | 65.2 $\pm$ 1.4                   | 63.5 $\pm$ 1.3                   | 60.8 $\pm$ 1.3                   | 59.5 $\pm$ 1.9                   | 57.4 $\pm$ 1.0                   |  |
| GDumb    | 83.9 $\pm$ 1.4                              | 80.1 $\pm$ 0.5                   | 77.6 $\pm$ 1.6                   | 71.7 $\pm$ 2.2                   | 67.5 $\pm$ 1.8                   | 64.0 $\pm$ 1.5                   | 59.4 $\pm$ 1.2                   | 58.6 $\pm$ 1.9                   | 55.7 $\pm$ 1.0                   |  |
| FACT     | 83.0 $\pm$ 1.2                              | 54.5 $\pm$ 1.4                   | 40.7 $\pm$ 1.0                   | 32.6 $\pm$ 1.0                   | 27.6 $\pm$ 0.9                   | 23.8 $\pm$ 0.7                   | 20.8 $\pm$ 0.5                   | 18.7 $\pm$ 0.4                   | 16.8 $\pm$ 0.3                   |  |
| FSA      | 82.7 $\pm$ 2.1                              | 75.4 $\pm$ 1.7                   | 72.5 $\pm$ 1.8                   | 69.5 $\pm$ 1.6                   | 66.8 $\pm$ 1.8                   | 64.5 $\pm$ 1.4                   | 63.1 $\pm$ 1.5                   | 62.7 $\pm$ 1.5                   | 60.3 $\pm$ 1.3                   |  |
| FSA-FiLM | <b>89.2 <math>\pm</math> 0.9</b>            | <b>85.8 <math>\pm</math> 1.3</b> | <b>84.3 <math>\pm</math> 1.3</b> | <b>81.0 <math>\pm</math> 1.3</b> | <b>77.9 <math>\pm</math> 1.7</b> | <b>75.9 <math>\pm</math> 1.0</b> | <b>74.3 <math>\pm</math> 1.4</b> | <b>74.2 <math>\pm</math> 1.1</b> | <b>70.9 <math>\pm</math> 1.0</b> |  |

Table 33. Detailed accuracy for each incremental session on **CIFAR100** under the **few-shot CIL** setting. GDumb is the only memory-based method used for comparisons; we use a buffer size equal to the first session’s number of images  $N_1$ . The best results across all methods are in bold while the best results across the no-memory methods are underlined. A pre-trained EfficientNet-B0 on Imagenet-1k is used as a backbone for all methods.

| Method   | Accuracy (%) in each session ( $\uparrow$ ) |                                  |                                  |                                  |                                  |
|----------|---------------------------------------------|----------------------------------|----------------------------------|----------------------------------|----------------------------------|
|          | 1                                           | 2                                | 3                                | 4                                | 5                                |
| NA       | 73.5 $\pm$ 4.6                              | 53.3 $\pm$ 3.7                   | 37.3 $\pm$ 1.8                   | 33.6 $\pm$ 1.5                   | 28.3 $\pm$ 1.1                   |
| GDumb    | 78.2 $\pm$ 4.9                              | 46.7 $\pm$ 5.1                   | 35.2 $\pm$ 1.6                   | 23.3 $\pm$ 3.8                   | 21.0 $\pm$ 2.1                   |
| FACT     | 71.3 $\pm$ 1.0                              | 46.6 $\pm$ 3.5                   | 34.0 $\pm$ 1.9                   | 27.7 $\pm$ 2.5                   | 24.1 $\pm$ 2.0                   |
| FSA      | 70.7 $\pm$ 2.9                              | 50.8 $\pm$ 3.9                   | 38.4 $\pm$ 3.2                   | 35.7 $\pm$ 1.6                   | 32.9 $\pm$ 1.0                   |
| FSA-FiLM | <b>90.7 <math>\pm</math> 1.8</b>            | <b>70.4 <math>\pm</math> 1.4</b> | <b>60.5 <math>\pm</math> 1.5</b> | <b>55.5 <math>\pm</math> 2.3</b> | <b>51.3 <math>\pm</math> 2.1</b> |

Table 34. Detailed accuracy for each incremental session on **SVHN** under the **few-shot CIL** setting. GDumb is the only memory-based method used for comparisons; we use a buffer size equal to the first session’s number of images  $N_1$ . The best results across all methods are in bold while the best results across the no-memory methods are underlined. A pre-trained EfficientNet-B0 on Imagenet-1k is used as a backbone for all methods.

| Method   | Accuracy (%) in each session ( $\uparrow$ ) |                                  |                                  |                                  |                                  |                                  |                                  |
|----------|---------------------------------------------|----------------------------------|----------------------------------|----------------------------------|----------------------------------|----------------------------------|----------------------------------|
|          | 1                                           | 2                                | 3                                | 4                                | 5                                | 6                                | 7                                |
| NA       | 35.7 $\pm$ 1.4                              | 26.4 $\pm$ 1.7                   | 22.1 $\pm$ 1.7                   | 18.1 $\pm$ 1.2                   | 15.4 $\pm$ 0.8                   | 13.5 $\pm$ 0.7                   | 11.9 $\pm$ 0.4                   |
| GDumb    | 36.4 $\pm$ 7.9                              | 29.9 $\pm$ 6.3                   | <u>20.3 <math>\pm</math> 3.6</u> | 22.1 $\pm$ 5.5                   | 13.1 $\pm$ 2.1                   | 11.7 $\pm$ 3.2                   | 16.4 $\pm$ 2.6                   |
| FACT     | 32.6 $\pm$ 1.4                              | 22.7 $\pm$ 2.2                   | 18.4 $\pm$ 2.1                   | 14.4 $\pm$ 1.9                   | 12.4 $\pm$ 1.5                   | 11.9 $\pm$ 1.6                   | 11.7 $\pm$ 1.7                   |
| FSA      | 57.4 $\pm$ 2.3                              | 44.8 $\pm$ 2.8                   | 39.3 $\pm$ 1.6                   | 34.8 $\pm$ 2.1                   | 32.9 $\pm$ 1.9                   | 33.2 $\pm$ 2.6                   | 33.7 $\pm$ 1.7                   |
| FSA-FiLM | <b>62.7 <math>\pm</math> 2.1</b>            | <b>50.2 <math>\pm</math> 2.4</b> | <b>46.9 <math>\pm</math> 2.3</b> | <b>40.1 <math>\pm</math> 2.2</b> | <b>37.3 <math>\pm</math> 2.5</b> | <b>36.1 <math>\pm</math> 2.2</b> | <b>35.7 <math>\pm</math> 2.1</b> |

Table 35. Detailed accuracy for each incremental session on **dSprites-position** under the **few-shot CIL** setting. GDumb is the only memory-based method used for comparisons; we use a buffer size equal to the first session’s number of images  $N_1$ . The best results across all methods are in bold while the best results across the no-memory methods are underlined. A pre-trained EfficientNet-B0 on Imagenet-1k is used as a backbone for all methods.

| Method   | Accuracy (%) in each session ( $\uparrow$ ) |                                  |                                  |                                  |                                  |                                  |                                  |                                  |                                  |
|----------|---------------------------------------------|----------------------------------|----------------------------------|----------------------------------|----------------------------------|----------------------------------|----------------------------------|----------------------------------|----------------------------------|
|          | 1                                           | 2                                | 3                                | 4                                | 5                                | 6                                | 7                                | 8                                | 9                                |
| NA       | 35.5 $\pm$ 0.9                              | 28.7 $\pm$ 0.7                   | 36.4 $\pm$ 0.8                   | 42.8 $\pm$ 0.4                   | 40.0 $\pm$ 0.4                   | 39.4 $\pm$ 0.6                   | 41.4 $\pm$ 0.7                   | 40.3 $\pm$ 0.9                   | 41.0 $\pm$ 0.7                   |
| GDumb    | <b>51.1 <math>\pm</math> 1.7</b>            | <b>45.4 <math>\pm</math> 1.2</b> | 46.9 $\pm$ 1.8                   | 52.2 $\pm$ 1.0                   | 45.4 $\pm$ 1.7                   | 42.5 $\pm$ 1.6                   | 41.8 $\pm$ 0.9                   | 39.5 $\pm$ 1.9                   | 38.6 $\pm$ 1.0                   |
| FACT     | 41.4 $\pm$ 0.6                              | 25.9 $\pm$ 0.9                   | 19.6 $\pm$ 0.4                   | 16.3 $\pm$ 0.4                   | 13.7 $\pm$ 0.4                   | 11.3 $\pm$ 0.5                   | 10.4 $\pm$ 0.5                   | 9.4 $\pm$ 0.6                    | 8.3 $\pm$ 0.6                    |
| FSA      | 42.9 $\pm$ 2.6                              | 39.5 $\pm$ 2.0                   | 45.5 $\pm$ 1.5                   | 51.6 $\pm$ 1.7                   | 48.2 $\pm$ 1.8                   | 47.3 $\pm$ 1.4                   | 49.8 $\pm$ 1.5                   | 49.1 $\pm$ 1.7                   | 50.1 $\pm$ 1.5                   |
| FSA-FiLM | <u>46.6 <math>\pm</math> 1.9</u>            | <u>44.8 <math>\pm</math> 1.1</u> | <b>49.4 <math>\pm</math> 0.8</b> | <b>52.9 <math>\pm</math> 1.6</b> | <b>54.0 <math>\pm</math> 0.7</b> | <b>53.5 <math>\pm</math> 1.0</b> | <b>55.8 <math>\pm</math> 0.7</b> | <b>55.2 <math>\pm</math> 0.5</b> | <b>55.8 <math>\pm</math> 0.6</b> |

Table 36. Detailed accuracy for each incremental session on **FGVC-Aircraft** under the **few-shot CIL** setting. GDumb is the only memory-based method used for comparisons; we use a buffer size equal to the first session’s number of images  $N_1$ . The best results across all methods are in bold while the best results across the no-memory methods are underlined. A pre-trained EfficientNet-B0 on Imagenet-1k is used as a backbone for all methods.

| Method   | Accuracy (%) in each session ( $\uparrow$ ) |                                  |                                  |                                  |                                  |                                  |                                  |                                  |                                  |                                  |                                  |
|----------|---------------------------------------------|----------------------------------|----------------------------------|----------------------------------|----------------------------------|----------------------------------|----------------------------------|----------------------------------|----------------------------------|----------------------------------|----------------------------------|
|          | 1                                           | 2                                | 3                                | 4                                | 5                                | 6                                | 7                                | 8                                | 9                                | 10                               | 11                               |
| NA       | 82.1 $\pm$ 0.8                              | 76.6 $\pm$ 0.9                   | 73.0 $\pm$ 1.5                   | 69.6 $\pm$ 1.0                   | 69.0 $\pm$ 1.3                   | 67.6 $\pm$ 1.3                   | 65.8 $\pm$ 1.2                   | 64.1 $\pm$ 1.0                   | 60.4 $\pm$ 0.6                   | 59.0 $\pm$ 0.8                   | 57.6 $\pm$ 0.8                   |
| GDumb    | 91.3 $\pm$ 1.6                              | <b>91.8 <math>\pm</math> 1.2</b> | 80.0 $\pm$ 1.4                   | 72.0 $\pm$ 1.9                   | 69.2 $\pm$ 3.0                   | 63.5 $\pm$ 1.5                   | 59.9 $\pm$ 1.1                   | 54.5 $\pm$ 0.3                   | 48.0 $\pm$ 0.4                   | 44.3 $\pm$ 1.9                   | 41.2 $\pm$ 1.7                   |
| FACT     | 84.3 $\pm$ 1.4                              | 72.0 $\pm$ 1.2                   | 68.0 $\pm$ 2.2                   | 63.2 $\pm$ 1.0                   | 62.3 $\pm$ 1.0                   | 59.5 $\pm$ 1.2                   | 58.0 $\pm$ 1.0                   | 55.8 $\pm$ 1.0                   | 52.8 $\pm$ 0.7                   | 51.7 $\pm$ 0.8                   | 49.8 $\pm$ 0.8                   |
| FSA      | 87.0 $\pm$ 1.4                              | 79.6 $\pm$ 1.1                   | 76.4 $\pm$ 0.9                   | 72.7 $\pm$ 0.7                   | 73.0 $\pm$ 0.9                   | 71.3 $\pm$ 0.4                   | 69.7 $\pm$ 0.4                   | 68.4 $\pm$ 0.4                   | 64.7 $\pm$ 0.5                   | 62.9 $\pm$ 0.4                   | 62.2 $\pm$ 0.4                   |
| FSA-FiLM | <b>94.3 <math>\pm</math> 0.9</b>            | <u>90.6 <math>\pm</math> 0.3</u> | <b>88.6 <math>\pm</math> 1.0</b> | <b>85.1 <math>\pm</math> 0.6</b> | <b>84.9 <math>\pm</math> 0.4</b> | <b>84.0 <math>\pm</math> 0.4</b> | <b>82.5 <math>\pm</math> 0.7</b> | <b>81.1 <math>\pm</math> 0.4</b> | <b>76.8 <math>\pm</math> 0.4</b> | <b>75.0 <math>\pm</math> 0.4</b> | <b>73.4 <math>\pm</math> 0.4</b> |

Table 37. Detailed accuracy for each incremental session on **Letters** under the **few-shot CIL** setting. GDumb is the only memory-based method used for comparisons; we use a buffer size equal to the first session’s number of images  $N_1$ . The best results across all methods are in bold while the best results across the no-memory methods are underlined. A pre-trained EfficientNet-B0 on Imagenet-1k is used as a backbone for all methods.

| Method   | Accuracy (%) in each session ( $\uparrow$ ) |                                  |                                  |                                  |                                  |                                  |                                  |                                  |                                  |
|----------|---------------------------------------------|----------------------------------|----------------------------------|----------------------------------|----------------------------------|----------------------------------|----------------------------------|----------------------------------|----------------------------------|
|          | 1                                           | 2                                | 3                                | 4                                | 5                                | 6                                | 7                                | 8                                | 9                                |
| NA       | 83.3 $\pm$ 1.0                              | 62.6 $\pm$ 0.5                   | 60.9 $\pm$ 1.0                   | 61.5 $\pm$ 0.3                   | 68.3 $\pm$ 1.2                   | 71.1 $\pm$ 0.6                   | 72.0 $\pm$ 0.7                   | 70.8 $\pm$ 1.0                   | 69.0 $\pm$ 0.3                   |
| GDumb    | <b>88.3 <math>\pm</math> 0.4</b>            | 63.6 $\pm$ 0.8                   | 58.6 $\pm$ 0.6                   | 56.4 $\pm$ 1.0                   | 66.0 $\pm$ 1.1                   | 68.7 $\pm$ 0.4                   | 68.9 $\pm$ 0.6                   | 65.8 $\pm$ 1.0                   | 63.2 $\pm$ 1.1                   |
| FACT     | 84.3 $\pm$ 0.6                              | 53.6 $\pm$ 0.6                   | 43.0 $\pm$ 0.5                   | 35.9 $\pm$ 0.6                   | 28.3 $\pm$ 0.6                   | 24.2 $\pm$ 0.3                   | 22.6 $\pm$ 0.3                   | 22.0 $\pm$ 0.5                   | 20.6 $\pm$ 0.2                   |
| FSA      | 85.2 $\pm$ 0.3                              | 63.3 $\pm$ 0.3                   | 61.4 $\pm$ 0.7                   | 61.6 $\pm$ 0.5                   | 68.5 $\pm$ 0.9                   | 71.2 $\pm$ 1.1                   | 72.2 $\pm$ 0.5                   | 71.2 $\pm$ 0.7                   | 70.3 $\pm$ 0.4                   |
| FSA-FiLM | <u>87.7 <math>\pm</math> 0.3</u>            | <b>68.5 <math>\pm</math> 0.6</b> | <b>66.9 <math>\pm</math> 0.4</b> | <b>66.7 <math>\pm</math> 0.9</b> | <b>73.7 <math>\pm</math> 0.6</b> | <b>76.0 <math>\pm</math> 0.7</b> | <b>76.0 <math>\pm</math> 0.5</b> | <b>75.0 <math>\pm</math> 0.6</b> | <b>74.0 <math>\pm</math> 0.3</b> |

Table 38. Detailed accuracy for each incremental session on **DomainNet** under the **few-shot CIL** setting. GDumb is the only memory-based method used for comparisons; we use a buffer size equal to the first session’s number of images  $N_1$ . The best results across all methods are in bold while the best results across the no-memory methods are underlined. A pre-trained EfficientNet-B0 on Imagenet-1k is used as a backbone for all methods.

| Method   | Accuracy (%) in each session ( $\uparrow$ ) |             |             |             |             |             |             |             |             |
|----------|---------------------------------------------|-------------|-------------|-------------|-------------|-------------|-------------|-------------|-------------|
|          | <b>1</b>                                    | <b>2</b>    | <b>3</b>    | <b>4</b>    | <b>5</b>    | <b>6</b>    | <b>7</b>    | <b>8</b>    | <b>9</b>    |
| NA       | 51.9                                        | 52.8        | 44.9        | 46.8        | 49.3        | 51.7        | 54.4        | 53.8        | 49.7        |
| GDumb    | 56.4                                        | 50.1        | 36.3        | 47.5        | 44.2        | 44.7        | 46.4        | 40.9        | 40.4        |
| FACT     | 54.9                                        | 29.9        | 24.6        | 23.8        | 20.4        | 17.8        | 15.7        | 16.4        | 14.3        |
| FSA      | 52.1                                        | 53.6        | 40.0        | 47.8        | 49.2        | 51.3        | 55.1        | 55.1        | 51.5        |
| FSA-FiLM | <b>61.8</b>                                 | <b>61.6</b> | <b>52.0</b> | <b>56.5</b> | <b>57.0</b> | <b>59.4</b> | <b>61.8</b> | <b>61.2</b> | <b>58.8</b> |

Table 39. Detailed accuracy for each incremental session on **iNaturalist** under the **few-shot CIL** setting. GDumb is the only memory-based method used for comparisons; we use a buffer size equal to the first session’s number of images  $N_1$ . The best results across all methods are in bold while the best results across the no-memory methods are underlined. A pre-trained EfficientNet-B0 on Imagenet-1k is used as a backbone for all methods.

## References

- [1] Charles Beattie, Joel Z Leibo, Denis Teplyashin, Tom Ward, Marcus Wainwright, Heinrich Küttler, Andrew Lefrancq, Simon Green, Víctor Valdés, Amir Sadik, et al. Deepmind lab. *arXiv preprint arXiv:1612.03801*, 2016. 2
- [2] John Bronskill, Daniela Massiceti, Massimiliano Patacchiola, Katja Hofmann, Sebastian Nowozin, and Richard Turner. Memory efficient meta-learning with large images. *Advances in Neural Information Processing Systems*, 34:24327–24339, 2021. 3
- [3] Gong Cheng, Junwei Han, and Xiaoqiang Lu. Remote sensing image scene classification: Benchmark and state of the art. *Proceedings of the IEEE*, 105(10):1865–1883, 2017. 2
- [4] Mircea Cimpoi, Subhransu Maji, Iasonas Kokkinos, Sammy Mohamed, and Andrea Vedaldi. Describing textures in the wild. In *Proceedings of the IEEE Conference on Computer Vision and Pattern Recognition*, pages 3606–3613, 2014. 2
- [5] T. E. de Campos, B. R. Babu, and M. Varma. Character recognition in natural images. In *Proceedings of the International Conference on Computer Vision Theory and Applications, Lisbon, Portugal*, February 2009. 2
- [6] Li Fei-Fei, Robert Fergus, and Pietro Perona. One-shot learning of object categories. *IEEE Transactions on Pattern Analysis and Machine Intelligence*, 28(4):594–611, 2006. 2
- [7] Andreas Geiger, Philip Lenz, Christoph Stiller, and Raquel Urtasun. Vision meets robotics: The kitti dataset. *The International Journal of Robotics Research*, 32(11):1231–1237, 2013. 2
- [8] Patrick Helber, Benjamin Bischke, Andreas Dengel, and Damian Borth. Eurosat: A novel dataset and deep learning benchmark for land use and land cover classification. *IEEE Journal of Selected Topics in Applied Earth Observations and Remote Sensing*, 12(7):2217–2226, 2019. 2
- [9] Elad Hoffer and Nir Ailon. Deep metric learning using triplet network. In *Similarity-Based Pattern Recognition: Third International Workshop, SIMBAD 2015, Copenhagen, Denmark, October 12-14, 2015. Proceedings 3*, pages 84–92. Springer, 2015. 3
- [10] Justin Johnson, Bharath Hariharan, Laurens Van Der Maaten, Li Fei-Fei, C Lawrence Zitnick, and Ross Girshick. Clevr: A diagnostic dataset for compositional language and elementary visual reasoning. In *Proceedings of the IEEE/CVF Conference on Computer Vision and Pattern Recognition*, pages 2901–2910, 2017. 2
- [11] Kaggle and EyePacs. Kaggle diabetic retinopathy detection. <https://www.kaggle.com/c/diabetic-retinopathy-detection/data>, 2015. 2
- [12] Diederik P Kingma and Jimmy Ba. Adam: A method for stochastic optimization. *arXiv preprint arXiv:1412.6980*, 2014. 3
- [13] Jonathan Krause, Michael Stark, Jia Deng, and Li Fei-Fei. 3d object representations for fine-grained categorization. In *Proceedings of the IEEE International Conference on Computer Vision Workshops*, pages 554–561, 2013. 2
- [14] Alex Krizhevsky, Geoffrey Hinton, et al. Learning multiple layers of features from tiny images. 2009. 2
- [15] Yann LeCun, Fu Jie Huang, and Leon Bottou. Learning methods for generic object recognition with invariance to pose and lighting. In *Proceedings of the IEEE Conference on Computer Vision and Pattern Recognition*, volume 2, pages II–104. IEEE, 2004. 2
- [16] Vincenzo Lomonaco and Davide Maltoni. Core50: A new dataset and benchmark for continuous object recognition. In *Conference on Robot Learning*, pages 17–26. PMLR, 2017. 2
- [17] Subhransu Maji, Esa Rahtu, Juho Kannala, Matthew Blaschko, and Andrea Vedaldi. Fine-grained visual classification of aircraft. *arXiv preprint arXiv:1306.5151*, 2013. 2
- [18] Loic Matthey, Irina Higgins, Demis Hassabis, and Alexander Lerchner. dsprites: Disentanglement testing sprites dataset. <https://github.com/deepmind/dsprites-dataset/>, 2017. 2
- [19] Yuval Netzer, Tao Wang, Adam Coates, Alessandro Bissacco, Bo Wu, and Andrew Y Ng. Reading digits in natural images with unsupervised feature learning. 2011. 2
- [20] Maria-Elena Nilsback and Andrew Zisserman. Automated flower classification over a large number of classes. In *2008 Sixth Indian Conference on Computer Vision, Graphics & Image Processing*, pages 722–729. IEEE, 2008. 2

- [21] Omkar M Parkhi, Andrea Vedaldi, Andrew Zisserman, and CV Jawahar. Cats and dogs. In *2012 IEEE Conference on Computer Vision and Pattern Recognition*, pages 3498–3505. IEEE, 2012. [2](#)
- [22] Can Peng, Kun Zhao, Tianren Wang, Meng Li, and Brian C Lovell. Few-shot class-incremental learning from an open-set perspective. In *Computer Vision–ECCV 2022: 17th European Conference, Tel Aviv, Israel, October 23–27, 2022, Proceedings, Part XXV*, pages 382–397. Springer, 2022. [3](#), [16](#), [17](#)
- [23] Xingchao Peng, Qinxun Bai, Xide Xia, Zijun Huang, Kate Saenko, and Bo Wang. Moment matching for multi-source domain adaptation. In *Proceedings of the IEEE/CVF Conference on Computer Vision and Pattern Recognition*, pages 1406–1415, 2019. [2](#)
- [24] Ameya Prabhu, Philip HS Torr, and Puneet K Dokania. GDumb: A simple approach that questions our progress in continual learning. In *European Conference on Computer Vision*, pages 524–540. Springer, 2020. [3](#)
- [25] Grant Van Horn, Oisin Mac Aodha, Yang Song, Yin Cui, Chen Sun, Alex Shepard, Hartwig Adam, Pietro Perona, and Serge Belongie. The iNaturalist Species Classification and Detection Dataset. In *Proceedings of the IEEE Conference/CVF on Computer Vision and Pattern Recognition*, pages 8769–8778, 2018. [2](#)
- [26] Bastiaan S Veeling, Jasper Linmans, Jim Winkens, Taco Cohen, and Max Welling. Rotation equivariant cnns for digital pathology. In *International Conference on Medical image computing and computer-assisted intervention*, pages 210–218. Springer, 2018. [2](#)
- [27] C. Wah, S. Branson, P. Welinder, P. Perona, and S. Belongie. Technical Report CNS-TR-2011-001, California Institute of Technology, 2011. [2](#)
- [28] Jianxiong Xiao, James Hays, Krista A Ehinger, Aude Oliva, and Antonio Torralba. Sun database: Large-scale scene recognition from abbey to zoo. In *2010 IEEE Conference on Computer Vision and Pattern Recognition*, pages 3485–3492. IEEE, 2010. [2](#)
- [29] Lu Yu, Bartłomiej Twardowski, Xialei Liu, Luis Heranz, Kai Wang, Yongmei Cheng, Shangling Jui, and Joost van de Weijer. Semantic drift compensation for class-incremental learning. In *Proceedings of the IEEE/CVF conference on computer vision and pattern recognition*, pages 6982–6991, 2020. [3](#)
- [30] Xiaohua Zhai, Joan Puigcerver, Alexander Kolesnikov, Pierre Ruysen, Carlos Riquelme, Mario Lucic, Josip Djolonga, Andre Susano Pinto, Maxim Neumann, Alexey Dosovitskiy, et al. A large-scale study of representation learning with the visual task adaptation benchmark. *arXiv preprint arXiv:1910.04867*, 2019. [1](#)
- [31] Da-Wei Zhou, Fu-Yun Wang, Han-Jia Ye, Liang Ma, Shiliang Pu, and De-Chuan Zhan. Forward compatible few-shot class-incremental learning. In *Proceedings of the IEEE/CVF Conference on Computer Vision and Pattern Recognition*, pages 9046–9056, 2022. [2](#), [3](#), [16](#), [17](#)
